# Supplementary material for: Density functional theory study of the mechanism of zinc carbenoid promoted cyclopropanation of allenamides
Source: Royal Society of Chemistry journal article supplement (doi:10.1039/c3ra42168f), 2013-01-01
Supplement: c3ra42168f.pdf [file c3ra42168f.pdf]

# Density Functional Theory Study of the Mechanism of Zinc Carbenoid Promoted Cyclopropanation of Allenamides†

Huiying Xu,<sup>a</sup> Xiting Zhang,<sup>a,b</sup> Zhuo-Feng Ke,<sup>a</sup> Zhi-Feng Li,<sup>a</sup> Xian-Yan Xu,<sup>a</sup> Cheng-Yong Su,<sup>a</sup>

David Lee Phillips<sup>\*b</sup> and Cunyuan Zhao<sup>\*a</sup>

<sup>a</sup>MOE Key Laboratory of Bioinorganic and Synthetic Chemistry/KLGHEI of Environment and Energy Chemistry, School of Chemistry and Chemical Engineering, Sun Yat-Sen University, Guangzhou 510275, P. R. China. E-mail: ceszhcy@mail.sysu.edu.cn; Fax: +8620 8411 0523; Tel: +8620 8411 0523; <sup>b</sup>Department of Chemistry, The University of Hong Kong, Pokfulam Road, Hong Kong, P. R. China. E-mail: phillips@hku.hk

## Electronic Supplementary Information Index

|                                                                                                                                                                  |     |
|------------------------------------------------------------------------------------------------------------------------------------------------------------------|-----|
| 1. Cartesian coordinates and energies of computed structures of Figure 2 .....                                                                                   | S2  |
| 2. Cartesian coordinates and energies of computed structures of Figure 3 .....                                                                                   | S7  |
| 3. Cartesian coordinates and energies of computed structures of Figure 4 .....                                                                                   | S10 |
| 4. Cartesian coordinates and energies of computed structures of Figures 5 and 6.....                                                                             | S12 |
| 5. References.....                                                                                                                                               | S23 |
| 6. Comparison of different polarized continuum models .....                                                                                                      | S23 |
| 7. Explicit solvent effects .....                                                                                                                                | S24 |
| 8. PES scan of alpha-unsubstituted allenamide <b>1</b> with frozen dihedral angle coordinates.....                                                               | S24 |
| 9. PES scan of alpha-substituted allenamide <b>4</b> .....                                                                                                       | S25 |
| 10. Cartesian coordinates and energies of computed structures of the model reaction with allenamine (CH <sub>3</sub> ) <sub>2</sub> N-CH=C=CH <sub>2</sub> ..... | S26 |

## 1. Cartesian coordinates and energies of computed structures of Figure 2

### 1

C,0,-3.5318969194,-0.2809668573,0.0445369663  
H,0,-4.0240465495,-0.4839247406,0.9962595039  
H,0,-4.0908952216,-0.5440818499,-0.8541459938  
C,0,-2.3460197646,0.2586062983,-0.0156015195  
C,0,-1.1621871376,0.8187247083,-0.0821855396  
H,0,-1.023531465,1.8982500961,-0.1218490677  
N,0,0.0379264509,0.1075368402,-0.1115866418  
C,0,0.1418829995,-1.3165179328,0.0883114511  
C,0,1.2618370752,0.7376891335,0.0111668051  
O,0,1.4725265169,1.9197982159,0.0332766615  
O,0,2.2194345496,-0.2182985564,0.1105138551  
C,0,1.646737697,-1.5066502391,-0.1006950185  
H,0,1.8884472772,-1.8346482382,-1.1192632225  
H,0,2.0899011022,-2.2069691754,0.6115209752  
H,0,-0.2106919806,-1.597257173,1.0926430026  
H,0,-0.4539616302,-1.8699755296,-0.6468542174

-----  
Sum of electronic and thermal Free Energies=  
-437.634740 (Hartree/Particle)

No imaginary frequency.

### M-RC-T

C,0,-4.9792599272,-1.8159103121,-1.193405327  
H,0,-5.7563436115,-2.3935081011,-0.6925791495  
H,0,-5.2293225633,-1.4092284418,-2.1731416221  
C,0,-3.8074144622,-1.6308513507,-0.6538666943  
C,0,-2.6250498592,-1.4676669065,-0.1137114833  
H,0,-1.7992507451,-2.1575224618,-0.2760793909  
N,0,-2.3039773751,-0.3903967677,0.7239937218  
C,0,-3.1597229236,0.7651183291,0.8883749801  
C,0,-1.017956805,-0.1059394633,1.0644248541  
O,0,-0.0374832822,-0.8071639366,0.8710015135  
O,0,-0.9581821456,1.0804183612,1.6821740102  
C,0,-2.2563451072,1.6870071267,1.7133896492  
H,0,-2.1704338722,2.6894482962,1.2855317487  
H,0,-2.568821854,1.7635111709,2.7595586676  
H,0,3.0845570594,-1.5389205175,1.3741301417  
C,0,3.0357777051,-1.346684078,0.2989827364  
H,0,2.7988019898,-2.2911277068,-0.1983437839  
Zn,0,1.7903942224,0.0822642226,-0.1419967388  
Cl,0,4.7279808423,-0.9063759121,-0.2220363277  
C,0,1.0291398697,1.7361247566,-0.874713269  
H,0,1.629433034,2.1742998717,-1.6752004142  
H,0,0.8575618703,2.5058979975,-0.1170333607  
Cl,0,-0.6155814191,1.4273423917,-1.6311826348  
H,0,-3.4101754076,1.1821637636,-0.0976235408  
H,0,-4.0908822327,0.4988116685,1.4011127053

-----  
Sum of electronic and thermal Free Energies=  
-1663.667199 (Hartree/Particle)

No imaginary frequency.

### M-TS-T1

C,0,-1.8830127003,0.3501262678,3.4412584144  
H,0,-2.562258383,-0.2168059484,4.0787524005  
H,0,-1.5352695505,1.3079989189,3.8277832773  
C,0,-1.5001813072,-0.106552735,2.2831872947  
C,0,-1.1488810594,-0.6580269757,1.1253773736  
H,0,-0.3216334385,-1.3679726949,1.049147184  
N,0,-1.9383302758,-0.5304704214,-0.0265467022  
C,0,-3.2660769598,0.0550706509,-0.0283995763  
C,0,-1.3775913063,-0.4335741113,-1.2872986752  
O,0,-0.2142255969,-0.5732725362,-1.5852292738  
O,0,-2.3440602581,-0.1324904763,-2.1685473151  
C,0,-3.6120834023,-0.0981590496,-1.504433951  
H,0,-4.1910655617,0.7320917688,-1.9128482198  
H,0,-4.1346293931,-1.0410499878,-1.7045139566  
H,0,-3.9431723751,-0.4946101858,0.6329917105  
H,0,-3.2352055441,1.1062014014,0.2985397973  
H,0,-0.7011093614,1.773838946,0.6394390549  
C,0,0.1419524168,1.1709298096,0.9902762528  
H,0,0.4360107742,1.4753234109,2.0012081204  
Zn,0,1.5252649717,0.3666282916,-0.2220311887  
Cl,0,1.6664891366,2.7018864111,-0.2699345413  
C,0,2.7043801026,-1.1595500907,-0.4964978559  
H,0,2.7255377963,-1.5113579175,-1.5301313354  
H,0,3.7282586749,-1.0565560712,-0.133419275  
Cl,0,1.9832766004,-2.5508006752,0.4735269861

-----  
Sum of electronic and thermal Free Energies=  
-1663.622528 (Hartree/Particle)

One imaginary frequency -350.75.

### M-TS-T2

C,0,-0.1968334487,3.9080647495,-1.2082915899  
H,0,0.7435844054,3.9429063299,-1.7580625094  
H,0,-0.8918065219,4.7307262903,-1.3791963262  
C,0,-0.4853135689,2.9456015683,-0.3768150818  
C,0,-0.9391435268,2.0744039592,0.5189234694  
H,0,-0.7241323171,2.1854430193,1.5830482413  
N,0,-1.7448948068,0.994786477,0.2385682667  
C,0,-2.0881305209,0.5212765559,-1.0856215646  
C,0,-1.9632377333,0.0100648998,1.2033186921  
O,0,-1.6037280495,0.0482204152,2.3491427915  
O,0,-2.6445246135,-0.9934808667,0.6294085802  
C,0,-2.9799527448,-0.6663993914,-0.7257972174  
H,0,-4.0448729356,-0.4106971064,-0.7614119538  
H,0,-2.7800852182,-1.5464314476,-1.3405194059  
H,0,-2.6089411994,1.2912064441,-1.6646894667  
H,0,-1.18156144,0.2126117874,-1.6304438577  
H,0,1.5046697409,1.7776142647,-1.0380022301  
C,0,1.3262862868,1.4368289849,-0.0153230561  
H,0,1.7303571224,2.1444251522,0.7108562645  
Zn,0,1.2735075382,-0.5071179716,0.3077507003  
Cl,0,3.4787759309,0.170314539,-0.0048051952

C,0,0.4904251014,-2.284209318,0.3858708892  
H,0,1.2224980902,-3.0785106854,0.5415712413  
H,0,-0.3356508578,-2.4144635146,1.08815158  
Cl,0,-0.2132967129,-2.5915741347,-1.2849362619

-----  
Sum of electronic and thermal Free Energies=  
-1663.623374 (Hartree/Particle)  
One imaginary frequency -282.43.

### M-TS-T3

C,0,0.2127609757,0.413391041,2.9422109338  
H,0,1.2826000091,0.2391120639,2.8255607185  
H,0,-0.0918807198,1.0672572274,3.7585667905  
C,0,-0.6660207504,-0.135235496,2.1480399632  
C,0,-1.7470848695,-0.5691953062,1.5078844937  
H,0,-2.2457658428,-1.5029252608,1.7713867269  
N,0,-2.3069109133,0.0668483887,0.4217757997  
C,0,-1.796280625,1.2730694476,-0.1955612851  
C,0,-3.1837569356,-0.6081362041,-0.4279684051  
O,0,-3.6222221201,-1.7122949145,-0.2635827874  
O,0,-3.4483092019,0.1949807231,-1.4753660895  
C,0,-2.8522069357,1.4814186073,-1.2786933564  
H,0,-3.6341510181,2.179239594,-0.9569809995  
H,0,-2.4392998174,1.8200669972,-2.2308725854  
H,0,-1.735564154,2.1019871317,0.5173960516  
H,0,-0.7863087785,1.1074384781,-0.6003769694  
H,0,0.7311874198,-2.1173098689,1.4802139619  
C,0,0.4835084856,-1.5061230754,0.6100288647  
H,0,-0.3213311471,-1.968397558,0.0314642823  
Zn,0,1.762573303,-0.2874101512,-0.2264281967  
Cl,0,2.2227379022,-2.5375884835,-0.7402244913  
C,0,2.6013957136,1.3863665993,-0.7356066731  
H,0,3.5951419552,1.514509648,-0.2999320312  
H,0,2.6896044451,1.5139885963,-1.8168178351  
Cl,0,1.6067276201,2.7992657748,-0.1370778819

-----  
Sum of electronic and thermal Free Energies=  
-1663.623168 (Hartree/Particle)  
One imaginary frequency -330.08.

### M-PC-T

C,0,-2.2832847416,0.043139563,3.4786958001  
H,0,-3.1070913764,-0.6656338871,3.5349752547  
H,0,-2.19242961,0.7673639715,4.2847834794  
C,0,-1.422491846,0.0164410439,2.478091827  
C,0,-1.0567773857,-0.5848821034,1.2021807617  
H,0,-0.52426532,-1.5370043759,1.1939499648  
N,0,-1.9199058066,-0.4374179467,0.0641250681  
C,0,-3.1070689049,0.3934378397,0.0065902727  
C,0,-1.4722978394,-0.7106031119,-1.1812671516  
O,0,-0.3767160644,-1.1912345692,-1.4695101769  
O,0,-2.3877733919,-0.3926123301,-2.0958653211  
C,0,-3.547569267,0.1363168432,-1.4362265457  
H,0,-3.8536801351,1.0410902803,-1.9650134886  
H,0,-4.3456896409,-0.6115509998,-1.5013541048

H,0,-3.8540194291,0.0824344391,0.7440768092  
H,0,-2.854552664,1.4487184154,0.1871772316  
H,0,-0.4216440814,1.5842670497,1.3020174279  
C,0,-0.28688914,0.6126475447,1.7802593502  
H,0,0.7296032601,0.4050673418,2.1197295911  
Zn,0,1.2440253963,0.1599248896,-1.1230581347  
Cl,0,0.1725841134,2.009130077,-1.4874281836  
C,0,2.7869474075,-0.9115829858,-0.615823956  
H,0,2.9741739818,-1.7163559541,-1.3302170913  
H,0,3.7077231919,-0.3443282714,-0.4712556447  
Cl,0,2.4399122934,-1.7294377632,0.9772519605

-----  
Sum of electronic and thermal Free Energies=  
-1663.734247 (Hartree/Particle)  
No imaginary frequency.

### M-RC-B1

C,0,-1.4885579793,1.3320918946,2.1049261301  
H,0,-2.1728000977,1.8493472556,1.4319100555  
H,0,-1.8037441338,1.2016943056,3.1374620065  
C,0,-0.3241197298,0.8755891807,1.6736804293  
C,0,0.5790480137,0.7505399221,0.5308604347  
H,0,0.3375380269,-0.0047129652,-0.2208761403  
N,0,1.187043534,1.9032026301,-0.0570392762  
C,0,0.9397048395,3.2808525327,0.3217191119  
C,0,1.9351294682,1.8183823959,-1.175863669  
O,0,2.3118862353,0.7904733497,-1.7368473647  
O,0,2.2194635982,3.0310018925,-1.6505661561  
C,0,1.4797753843,4.0150078348,-0.9097554009  
H,0,2.1570285871,4.8367279414,-0.6689917804  
H,0,0.6744158223,4.3820860734,-1.5551597155  
H,0,-0.1315623549,3.4518137872,0.4744419273  
H,0,1.4743828719,3.5375823286,1.2461761966  
H,0,1.7357249554,0.7916113804,2.4513760328  
C,0,0.963554816,0.2346355816,1.9192849695  
H,0,1.0238564888,-0.8480637344,2.044469402  
Zn,0,2.7307249887,-1.0540960007,-0.7640380167  
Cl,0,4.2226879971,-0.4822046023,0.6659611105  
C,0,1.5275939074,-2.3620974507,-1.5876937372  
H,0,1.0871937349,-1.9942372007,-2.5180764754  
H,0,1.970556724,-3.3423166646,-1.7717158628  
Cl,0,0.1024551816,-2.7035819505,-0.4724920486  
Zn,0,-2.180765735,-0.8131640534,-0.2677048179  
C,0,-2.7830667212,-1.8494786134,1.2601310432  
H,0,-3.2030141802,-2.8245373044,1.0000402311  
H,0,-1.9896263393,-2.0006639992,1.9987339707  
Cl,0,-4.1064251635,-0.9225238326,2.1022748682  
C,0,-1.851486607,0.2748619521,-1.8589937387  
H,0,-0.8664296433,0.1006536566,-2.3052834443  
H,0,-2.6012146389,0.1116151427,-2.6376102869  
Cl,0,-1.9237608514,2.0642673338,-1.4891089884

-----  
Sum of electronic and thermal Free Energies=  
-2889.758534 (Hartree/Particle)  
No imaginary frequency.

### M-TS-B1

C,0,2.423030728,3.3979466345,0.7870002464  
H,0,3.0815609874,3.6165027621,-0.0514932616  
H,0,2.6251770007,3.9314293682,1.7133135512  
C,0,1.5187862682,2.4153234784,0.7314675529  
C,0,0.9151621988,1.3605398323,-0.0704757332  
H,0,0.1515655303,1.6348833398,-0.8027972249  
N,0,1.6853025278,0.2328473845,-0.4999624311  
C,0,2.9624219583,-0.1819540856,0.0504644819  
C,0,1.0791065373,-0.8124908569,-1.115945344  
O,0,-0.0944364768,-0.8617666873,-1.4744908695  
O,0,1.9413603564,-1.8108457917,-1.3016746275  
C,0,3.2323180612,-1.4124404554,-0.8140779041  
H,0,3.660330588,-2.251573068,-0.2633606036  
H,0,3.864942924,-1.1793631024,-1.6779267387  
H,0,3.7254395425,0.5946495635,-0.0652979382  
H,0,2.8671171574,-0.432169316,1.1179034914  
H,0,0.8774184523,0.8460501921,2.1360166848  
C,0,0.5325960908,1.5752243375,1.4013723458  
H,0,-0.4745738355,1.9567809814,1.5821341694  
Zn,0,-1.5302971914,-0.7696881488,0.1354429338  
Cl,0,-0.3433910191,-1.8083616878,1.6142452356  
C,0,-3.0283292202,0.2884199141,-0.515343541  
H,0,-3.285848202,0.0379347293,-1.546740144  
H,0,-3.9272503289,0.2345043165,0.1004556962  
Cl,0,-2.543024632,2.0503429821,-0.5381079311  
Zn,0,1.5507736942,6.4250593204,-0.1754650599  
C,0,0.6355372654,4.7015188014,0.1135470874  
H,0,0.3114631989,4.0975980624,-0.7374677419  
H,0,0.0230087072,4.5088310345,0.9965925418  
Cl,0,-0.7421239915,6.5897441281,-0.5501305494  
C,0,3.1212707831,7.5565438066,-0.2639399219  
H,0,3.2767404827,8.0190396809,-1.240880444  
H,0,3.1485227976,8.3411160845,0.495084344  
Cl,0,4.5863480787,6.5036623449,0.0399417568

-----  
Sum of electronic and thermal Free Energies=  
-2889.717859 (Hartree/Particle)

One imaginary frequency -326.46.

### M-PC-B1

C,0,-1.7133075462,0.6318846447,1.2869486209  
H,0,-2.0108142887,1.5608658088,0.7964520335  
H,0,-1.8501604192,0.6062493859,2.3663733702  
C,0,-0.5753465226,-0.1116554848,0.7115749166  
C,0,0.5605648389,0.1359309008,-0.1855806968  
H,0,0.6423399177,-0.4857129238,-1.0767529919  
N,0,1.0822441639,1.4546002414,-0.4081572406  
C,0,0.7098079746,2.6663067369,0.2982827097  
C,0,2.2942032672,1.6061632921,-0.9908950783  
O,0,2.9864732871,0.7081707842,-1.4683572891  
O,0,2.6665165424,2.8849102084,-0.9932819146  
C,0,1.634256788,3.6742656167,-0.3873601939  
H,0,2.1042633107,4.3771488009,0.3032013107  
H,0,1.1213883634,4.2296254326,-1.1805712608

H,0,-0.3460073687,2.9139057439,0.1527713892  
H,0,0.9138614276,2.5701348117,1.3755530351  
H,0,1.2560428752,0.0023842896,1.9351782559  
C,0,0.757992356,-0.569765948,1.1535907345  
H,0,0.9949527305,-1.6329674909,1.1226614063  
Zn,0,3.860826578,-0.583679044,-0.0068737473  
Cl,0,4.0065843245,0.8471602364,1.6154102998  
C,0,4.0078057251,-2.3475037085,-0.8153950877  
H,0,4.5121506449,-2.3118717555,-1.783591709  
H,0,4.4962429401,-3.0957723073,-0.1890157401  
Cl,0,2.3299264949,-2.9816828259,-1.1492073768  
Zn,0,-4.3719045688,0.5307109693,0.5968619219  
C,0,-1.9188956865,-0.6929858709,0.5379551928  
H,0,-2.3206679945,-0.6651386799,-0.4772326802  
H,0,-2.1953484795,-1.5578151088,1.1374123064  
Cl,0,-4.9815981418,-0.3844002398,2.4044822662  
C,0,-4.3845278575,1.4921784151,-1.0944923969  
H,0,-4.9370410809,0.9306132187,-1.8518607038  
H,0,-4.8634187957,2.4677142982,-0.9805827854  
Cl,0,-2.7410617999,1.8002915515,-1.7873818766

-----  
Sum of electronic and thermal Free Energies=  
-2889.820043 (Hartree/Particle)

No imaginary frequency.

### M-IM-T

C,0,2.1313492121,3.058822608,1.6705415105  
H,0,3.2058609721,3.1677583549,1.5343683415  
H,0,1.6932266094,3.5252351185,2.5499923654  
C,0,1.3929622266,2.3953925183,0.8017655125  
C,0,1.3759172677,1.6057489893,-0.4335470296  
H,0,1.4966367249,2.1047326996,-1.3997124808  
N,0,1.9192560546,0.2825968262,-0.3683859242  
C,0,3.3422090687,0.0501680667,-0.2020685191  
C,0,1.3591055836,-0.7353523834,-1.0724684309  
O,0,0.2461834681,-0.7540876412,-1.5770063391  
O,0,2.1978284636,-1.7810087834,-1.1272901323  
C,0,3.4072628617,-1.4596042384,-0.4259653651  
H,0,3.413959378,-2.0212905303,0.5151194301  
H,0,4.2525525589,-1.7726802631,-1.0432434913  
H,0,3.9139150997,0.6093565905,-0.9581722365  
H,0,3.6779430625,0.3525398048,0.7956941367  
H,0,-0.3284094143,1.0270586875,0.8832489639  
C,0,0.1059705081,1.87748625,0.3590207405  
H,0,-0.6214064997,2.5531337728,-0.0874240186  
H,0,-2.3032223204,-2.2528778111,-2.9945480501  
C,0,-1.9921264821,-1.4535377176,-3.6728609264  
H,0,-2.5014164799,-0.537510058,-3.3607784154  
Zn,0,-0.0565873782,-1.2468715743,-3.7299874139  
Cl,0,-2.6694061737,-1.8810705462,-5.3113786324  
C,0,1.7899170908,-1.1554667883,-4.3915322351  
H,0,1.8636597534,-1.056057604,-5.4767162419  
H,0,2.3998389894,-2.0102995289,-4.0862056522  
Cl,0,2.6656555045,0.317825041,-3.7263443464

Sum of electronic and thermal Free Energies=  
-1702.919627 (Hartree/Particle)  
No imaginary frequency.

### M-RC-B1'

C,0,0.1752709443,1.5492945493,2.2750469121  
H,0,-0.547413596,1.8041879555,1.4999494048  
H,0,0.173197594,2.1752846463,3.1648283552  
C,0,1.0265690981,0.5479283908,2.1586749409  
C,0,1.57433385,-0.5579326172,1.3575798168  
H,0,1.0096944584,-1.4929080438,1.3099855455  
N,0,2.3555837514,-0.3005793342,0.17566986  
C,0,3.8049556898,-0.386755309,0.1268476639  
C,0,1.8318683359,-0.5869042825,-1.0520169146  
O,0,0.6693464011,-0.8300656121,-1.3156969859  
O,0,2.8061883374,-0.5996013817,-1.9780066627  
C,0,4.0319659398,-0.184962832,-1.3676083442  
H,0,4.8452665274,-0.7870035258,-1.7776698708  
H,0,4.2020379496,0.8699001448,-1.613981688  
H,0,4.2866884776,0.3946872884,0.7237484261  
H,0,4.1567416582,-1.3662139143,0.4854577172  
H,0,3.126823858,0.3110644754,2.7349304342  
C,0,2.1570606723,-0.1876120086,2.7132660378  
H,0,2.0070116316,-0.8980065157,3.5249665066  
Zn,0,-1.2919220466,-0.0483764077,-0.3759598126  
C,0,-1.9276077533,-1.6432458053,0.5466374175  
H,0,-1.3184672794,-2.5206555747,0.3086847759  
H,0,-1.975516432,-1.5402651768,1.6348631863  
Cl,0,-3.6198165169,-2.041485089,-0.0008081541  
C,0,-1.0390576872,1.7230101284,-1.1580061539  
H,0,-0.0067767494,2.0720009104,-1.0405594902  
H,0,-1.2785014545,1.74873457,-2.2245605381  
Cl,0,-2.0889396597,2.9907053711,-0.3713093855

Sum of electronic and thermal Free Energies=  
-1702.910253 (Hartree/Particle)  
No imaginary frequency.

### M-TS-B1'

C,0,-1.5829968564,1.3590632523,0.7233968598  
H,0,-1.9864063039,1.839276764,-0.1662863004  
H,0,-2.169671475,1.4593797657,1.6346777862  
C,0,-0.3673233051,0.8046645976,0.7296852924  
C,0,0.8802425131,0.5644334274,0.0186028935  
H,0,0.972423936,-0.3078061828,-0.6301154459  
N,0,1.6476499879,1.6495726383,-0.4927034035  
C,0,1.7086853414,2.9718898399,0.0855757456  
C,0,2.7523586379,1.4003724383,-1.2836326132  
O,0,3.0869712963,0.3466201891,-1.7538200035  
O,0,3.417687148,2.56914282,-1.464403819  
C,0,2.6640908938,3.639239893,-0.9003887019  
H,0,3.3535727372,4.3456877704,-0.4322602499  
H,0,2.118506688,4.1491917906,-1.7044825529  
H,0,0.7254333313,3.4558484704,0.1133308526  
H,0,2.1156210462,2.954319313,1.1098327911

H,0,1.2109895817,0.9159853932,2.2488447225  
C,0,0.7423461861,0.2599852947,1.5147821555  
H,0,0.7527690509,-0.7943869393,1.7905070759  
Zn,0,-4.2039546402,-0.4724476786,-0.0305488875  
C,0,-2.2829776923,-0.809946865,0.2152473305  
H,0,-1.6232503065,-0.9710066792,-0.6396577711  
H,0,-1.887241214,-1.2608774938,1.127026606  
Cl,0,-3.6378291696,-2.7357188327,-0.2918303834  
C,0,-5.7851021644,0.6420450015,-0.1101183693  
H,0,-6.2787286994,0.6454329167,-1.084122291  
H,0,-6.5311016701,0.4089985253,0.6525649137  
Cl,0,-5.255446879,2.3644585702,0.201962767

Sum of electronic and thermal Free Energies=  
-1702.866646 (Hartree/Particle)  
One imaginary frequency -323.56.

### M-PC-B1'

C,0,-0.0990230038,-0.2672945457,0.7449601667  
H,0,0.028624343,0.1576141398,-0.2552876193  
H,0,-0.6124961329,0.3743984279,1.4629785762  
C,0,1.0377096859,-1.082851903,1.2277297695  
C,0,2.4572425816,-1.0892695185,0.8409730335  
H,0,2.9267786262,-2.0187010048,0.5243241313  
N,0,2.9851946355,0.0179041172,0.1075030246  
C,0,2.8915347259,1.4046193573,0.5032047956  
C,0,3.9967727309,-0.1655920894,-0.8080638466  
O,0,4.4584373107,-1.2074228664,-1.1931953033  
O,0,4.4152356396,1.057303606,-1.2335616865  
C,0,3.5479390983,2.0577747618,-0.7069753598  
H,0,4.1397958963,2.9432530371,-0.4634577726  
H,0,2.8010448334,2.3206985922,-1.4685143895  
H,0,1.8532913722,1.7327816946,0.6395674605  
H,0,3.4470367151,1.5966493729,1.4358083885  
H,0,2.1672729121,0.0280291862,2.7709220889  
C,0,2.0545401343,-0.9459213407,2.2964348493  
H,0,2.2505126858,-1.7914284177,2.9524706683  
Zn,0,-2.5345478565,0.2677681881,-0.6795719629  
C,0,-0.2103049259,-1.7789264384,0.8941528993  
H,0,-0.2555436863,-2.3698286762,-0.0180917359  
H,0,-0.8372816256,-2.1484637588,1.7032756135  
Cl,0,-3.1383277127,-1.6882391287,-1.159700949  
C,0,-2.2527932899,2.1636911836,-0.4101384358  
H,0,-3.0359216137,2.7567729514,-0.8871309664  
H,0,-2.209778834,2.430490897,0.6486802997  
Cl,0,-0.6840712455,2.6861441753,-1.1519597375

Sum of electronic and thermal Free Energies=  
-1702.968339 (Hartree/Particle)  
No imaginary frequency.

### M-TS-T1cis

C,0,-2.0278070281,0.6291349328,3.5548330168  
H,0,-2.817338549,0.2604630644,4.20884891  
H,0,-1.5536035946,1.5678181259,3.8397761621

C,0,-1.703418451,-0.0119567308,2.4692944559  
C,0,-1.3957971609,-0.7965072098,1.4429283666  
H,0,-0.6524365196,-1.5864202244,1.5698739071  
N,0,-1.940561066,-0.7562263312,0.1668204593  
C,0,-1.8060965858,-1.8244070325,-0.8090501308  
C,0,-2.7998111683,0.2373608451,-0.2842560847  
O,0,-3.1896916341,1.1891532926,0.3334777589  
O,0,-3.124661328,-0.0423201812,-1.5663978701  
C,0,-2.2949411971,-1.0976724327,-2.0562150819  
H,0,-2.8866800239,-1.7230112459,-2.7276724415  
H,0,-1.4627563356,-0.6534879893,-2.6182943785  
H,0,-0.7687486464,-2.1721816058,-0.8897586336  
H,0,-2.4464064056,-2.6770689797,-0.542782746  
H,0,-0.6774211892,1.8261998158,1.1404366973  
C,0,0.1313864261,1.125035872,1.3616271171  
H,0,0.4921737816,1.2195578659,2.3879452663  
Zn,0,1.3025005055,0.4534521388,-0.0539930233  
Cl,0,1.883727284,2.6424684419,0.480649365  
C,0,2.0396892729,-0.8878425247,-1.2521118923  
H,0,1.5748828743,-0.9403995632,-2.2400083852  
H,0,3.1181456849,-0.7900209188,-1.3919938197  
Cl,0,1.7899877839,-2.5392718154,-0.4909480247

-----  
Sum of electronic and thermal Free Energies=  
-1663.618478 (Hartree/Particle)  
One imaginary frequency -272.53.

#### M-TS-T2cis

C,0,0.0126902105,0.428554816,-0.1001688766  
H,0,-0.0133938423,0.4483142507,0.9890798809  
H,0,0.9728066297,0.6320334006,-0.5734359925  
C,0,-1.0395976474,0.1453658312,-0.8118211062  
C,0,-2.0629146464,-0.0360452014,-1.6393232223  
H,0,-2.6195212639,0.8341676231,-1.9911686849  
N,0,-2.4670745776,-1.2295197181,-2.2177256824  
C,0,-3.5568012473,-1.3223808547,-3.1714121865  
C,0,-2.1813192085,-2.477749518,-1.6655799758  
O,0,-1.4789736362,-2.6922351099,-0.7167116897  
O,0,-2.8425200054,-3.4106569657,-2.3753273062  
C,0,-3.4972254386,-2.8127610771,-3.4952430974  
H,0,-4.4854120986,-3.2652302253,-3.6001970767  
H,0,-2.9002432892,-3.0127527704,-4.3934211315  
H,0,-4.5160812163,-1.0442835525,-2.70735644  
H,0,-3.379296248,-0.6931017065,-4.0500007896  
H,0,-2.2829790709,-0.7388533246,1.0586047729

C,0,-2.9561312036,0.0036017209,0.6245582248  
H,0,-2.6644666618,1.0278239064,0.8594524801  
Zn,0,-4.8352680586,-0.5073677287,0.3697131479  
Cl,0,-4.4575016406,-0.0245789713,2.6134999935  
C,0,-6.4597799016,-1.1257805836,-0.5051522304  
H,0,-7.272988721,-1.2934577645,0.2039529208  
H,0,-6.8336257926,-0.4894294494,-1.3114723228  
Cl,0,-6.119447659,-2.7572006309,-1.2627592243

-----  
Sum of electronic and thermal Free Energies=  
-1663.616516 (Hartree/Particle)  
One imaginary frequency -265.66.

#### M-TS-T3cis

C,0,0.110709157,0.0353159048,-0.2326391132  
H,0,0.2230567694,-0.0315110023,0.8475730403  
H,0,1.0246614305,0.0770260061,-0.8224615477  
C,0,-1.0563130112,0.0173187697,-0.822469944  
C,0,-1.9844386172,0.1632438812,-1.7708737783  
H,0,-2.3171988677,1.1614850404,-2.0598115946  
N,0,-2.7025456835,-0.8553359042,-2.3903865692  
C,0,-3.4680483045,-0.6416190231,-3.6047458293  
C,0,-2.6207315253,-2.2047058567,-2.0737880606  
O,0,-2.003012083,-2.7116725231,-1.1738324976  
O,0,-3.3809129993,-2.8923584348,-2.9478162195  
C,0,-4.1562993884,-1.9981236792,-3.7457596017  
H,0,-5.1794251618,-1.9829325912,-3.3525875842  
H,0,-4.1724487875,-2.3723943462,-4.7713809823  
H,0,-4.1814106358,0.182715562,-3.4905822676  
H,0,-2.8036389199,-0.4142094671,-4.4496091297  
H,0,-2.5404552233,0.7650490207,1.0789296882  
C,0,-2.6526753073,-0.227386014,0.6345822197  
H,0,-3.5453212392,-0.2687322089,0.0090294535  
Zn,0,-1.9841418018,-1.9335960764,1.356601423  
Cl,0,-3.9717065281,-1.1297119669,2.477269322  
C,0,-0.7999958224,-3.3930098347,1.8340547681  
H,0,-0.7717909073,-3.6214255001,2.9011223779  
H,0,-1.0393297973,-4.3049764935,1.282125423  
Cl,0,0.9166664687,-2.9680472628,1.3647911512

-----  
Sum of electronic and thermal Free Energies=  
-1663.615427 (Hartree/Particle)  
One imaginary frequency -469.73.

## 2. Cartesian coordinates and energies of computed structures of Figure 3

### M-RC-O

C,0,0.0918169888,-1.4987224028,-1.6096112327  
H,0,-0.6844668986,-2.1126074357,-1.1432332483  
H,0,0.1717730359,-1.5580133934,-2.6958159708  
C,0,0.885259197,-0.733846001,-0.9047760685  
C,0,1.6863069777,0.0392722318,-0.2057807772  
H,0,1.4565294955,1.0846231888,0.0105077148  
N,0,2.9014227356,-0.3725630782,0.32880333  
C,0,3.5341782373,-1.6397666798,0.052481869  
C,0,3.7787172713,0.5312993652,0.9077942087  
O,0,3.5757576958,1.6939666966,1.1240895503  
O,0,4.9269559956,-0.1238862333,1.1923697152  
C,0,4.7742913986,-1.520516827,0.9396920317  
H,0,5.6865106577,-1.8887801194,0.4648373052  
H,0,4.6380719526,-2.0354208923,1.8982095494  
H,0,2.8886788566,-2.4807127938,0.331785653  
H,0,3.7725391648,-1.7321211727,-1.0178658156  
H,0,-0.5065599235,2.3252417786,-1.2506544965  
C,0,-1.5057204452,1.8954000124,-1.1357365133  
H,0,-1.8720639402,1.6244892731,-2.1297379912  
Zn,0,-1.5852401636,0.4169838474,0.1166777021  
Cl,0,-2.5824347765,3.2297166079,-0.5273448713  
C,0,-1.881481577,-0.9915301926,1.4235888445  
H,0,-0.9561977003,-1.4184268046,1.8197824068  
H,0,-2.5185495369,-0.7022286668,2.2621353763  
Cl,0,-2.7513436988,-2.3559173082,0.5742877287

-----  
Sum of electronic and thermal Free Energies=  
-1663.656898 (Hartree/Particle)  
No imaginary frequency.

### M-TS-O1

C,0,0.0882449787,-1.1105041737,0.0905285394  
H,0,-0.3640288137,-1.4595353375,1.0203718135  
H,0,-0.3647224632,-1.5000525293,-0.8225427729  
C,0,1.1928810665,-0.3899937063,0.0769476259  
C,0,2.2727598587,0.3558353227,0.0736495704  
H,0,2.2296464517,1.4460659119,0.0503974054  
N,0,3.5673025158,-0.1418402117,0.1005568018  
C,0,3.9167683802,-1.5375122065,-0.0160446934  
C,0,4.6652749785,0.6867719231,-0.0876084707  
O,0,4.6553969273,1.8822605026,-0.1816002772  
O,0,5.7683265408,-0.0918056553,-0.1522675285  
C,0,5.4355135245,-1.4488418314,0.1396833126  
H,0,5.9824966496,-2.0957100847,-0.5498496772  
H,0,5.7517005546,-1.6723968845,1.1653887241  
H,0,3.4425322739,-2.1364012652,0.7701901784  
H,0,3.6011693565,-1.9387609866,-0.9908614212  
H,0,-0.4651413255,1.3509845662,0.9676247374  
C,0,-0.9285051772,0.9777449559,0.0519908284  
H,0,-0.4222263422,1.35037355,-0.8409320208  
Zn,0,-2.8233076702,0.4429496206,-0.0013653648  
Cl,0,-2.5780542626,2.7646971026,0.0141653412  
C,0,-4.2393629425,-0.8783873464,-0.0518232468

H,0,-4.8892971754,-0.8686250723,0.8255838572  
H,0,-4.8659266668,-0.8263151705,-0.9445956779  
Cl,0,-3.4468872181,-2.527591994,-0.0810275845

-----  
Sum of electronic and thermal Free Energies=  
-1663.618622(Hartree/Particle)  
One imaginary frequency -314.48.

### M-TS-O2

C,0,0.0438967888,-1.0758913773,-0.0202005715  
H,0,-0.5011291177,-1.400504523,0.8673472079  
H,0,-0.5082489118,-1.1407144227,-0.9588798046  
C,0,1.21453219,-0.4695881305,0.0636640128  
C,0,2.3001913917,0.2568927585,0.1802725778  
H,0,2.200790786,1.330999534,0.3543062718  
N,0,3.6297951994,-0.1371148138,0.1136979126  
C,0,4.1369682739,-1.4103304865,-0.3488911005  
C,0,4.6280976035,0.8352774956,0.1106604608  
O,0,4.4811072386,2.0114587328,0.2939405598  
O,0,5.8066151701,0.2304850065,-0.1431733746  
C,0,5.6381968566,-1.1863279554,-0.1731432829  
H,0,6.2355240339,-1.5915603081,-0.9927685736  
H,0,6.0020006287,-1.6011415668,0.7742295844  
H,0,3.7718453474,-2.2497401147,0.2526196748  
H,0,3.8513001003,-1.58673199,-1.3975463085  
H,0,1.7947480634,-2.7499598034,-1.0846565967  
C,0,1.1804633937,-3.0654032312,-0.2414321426  
H,0,1.698905365,-2.969659316,0.713257538  
Zn,0,-0.266664496,-4.3761675999,-0.4730559431  
Cl,0,1.8847172369,-5.3535227534,-0.4928430191  
C,0,-2.107899153,-4.9526783856,-0.6158902697  
H,0,-2.3662093821,-5.3835866673,-1.5854488327  
H,0,-2.4156733174,-5.6510570435,0.1651322831  
Cl,0,-3.1487795798,-3.4644412084,-0.4174639239

-----  
Sum of electronic and thermal Free Energies=  
-1663.615832 (Hartree/Particle)  
One imaginary frequency -330.78.

### M-PC-O

C,0,0.0877013431,-0.2971818587,-0.608080451  
H,0,-0.24775375,-1.2437669774,-0.1732928731  
H,0,0.0939510297,-0.2562596715,-1.6985994921  
C,0,1.0718121218,0.4798151042,0.1373733062  
C,0,2.3086731183,0.6297448651,0.5867465075  
H,0,2.6029374759,1.4733039333,1.2076046927  
N,0,3.3562031709,-0.2417448466,0.3256612338  
C,0,3.2939818796,-1.3692608021,-0.573722912  
C,0,4.661673491,0.0666124907,0.6762217194  
O,0,5.0381406281,1.0181797992,1.3029986195  
O,0,5.4710397227,-0.9005021837,0.1826756869  
C,0,4.6929597503,-1.9553909232,-0.3781501591

H,0,5.163931716,-2.276782349,-1.3102705112  
H,0,4.6859733902,-2.7969945164,0.3251984455  
H,0,2.5012622865,-2.0696729503,-0.2878095011  
H,0,3.1046411833,-1.0371833039,-1.6055438426  
H,0,-0.8503838727,0.940987096,1.0647097469  
C,0,-0.278528686,1.0170957664,0.1352031958  
H,0,-0.5010488656,1.8850945183,-0.4870558832  
Zn,0,-2.6186074425,-0.1048560006,-0.6364808028  
Cl,0,-2.719639788,0.9021177028,-2.5023927339  
C,0,-3.1475238645,-1.1321404002,0.9281768554  
H,0,-3.9120780814,-0.5974977867,1.4971534117  
H,0,-3.5631568418,-2.0973198943,0.6285763444  
Cl,0,-1.797254115,-1.4816388116,2.0761313963

-----  
Sum of electronic and thermal Free Energies=  
-1663.721839 (Hartree/Particle)

No imaginary frequency.

### M-RC-B2

C,0,-3.6500412087,-0.5729645011,-2.1989015931  
H,0,-4.4207982468,-1.338053689,-2.1062377588  
H,0,-3.0917862557,-0.6140216926,-3.1339604126  
C,0,-2.9731501775,-0.0980557617,-0.9920190201  
C,0,-2.1095491866,-0.2875396654,-0.0091517345  
H,0,-1.9220723264,0.4561077095,0.7634661985  
N,0,-1.349167628,-1.4530607952,0.1506889938  
C,0,-1.2999283142,-2.5218853759,-0.8252316438  
C,0,-0.2465876849,-1.4813142117,0.9541473134  
O,0,0.1015051837,-0.6179431127,1.7439836752  
O,0,0.427700656,-2.6218262548,0.7727522756  
C,0,-0.2454951842,-3.4342463431,-0.1971181565  
H,0,0.4977355923,-3.7909254672,-0.9139481389  
H,0,-0.6869983781,-4.2906616502,0.3244353302  
H,0,-2.2756644485,-3.0064096351,-0.9364878574  
H,0,-0.9886077642,-2.1227911892,-1.8008812655  
H,0,-4.9058202082,0.9457049532,-1.1208337602  
C,0,-3.9420884073,0.7991671208,-1.6070324752  
H,0,-3.5769259322,1.6719094766,-2.1468742729  
H,0,-0.7095613314,2.8457489392,1.7024009497  
C,0,0.2461073622,2.5284918109,2.1307804401  
H,0,0.0510814003,2.1304611879,3.1304683194  
Zn,0,1.2082141977,1.2429179089,1.0329895415  
Cl,0,1.226908957,4.0477925439,2.3589218614  
C,0,2.3699273147,0.3264478188,-0.2453569751  
H,0,3.1302207013,0.9417531959,-0.7299505174  
H,0,2.8500003702,-0.56425038,0.169385125  
Cl,0,1.3079889475,-0.2914889406,-1.6161294416

-----  
Sum of electronic and thermal Free Energies=  
-1702.926335 (Hartree/Particle)

No imaginary frequency.

### M-TS-B2

C,0,-0.2441337338,-0.3828054714,0.2952555509  
H,0,-0.4138741364,0.4894109645,0.9258929414

H,0,-0.4514747127,-1.3329545454,0.7884007591  
C,0,0.805142148,-0.3225004205,-0.7216092819  
C,0,2.094386684,-0.1052875263,-1.0240041423  
H,0,2.4287384829,0.036908783,-2.0511551465  
N,0,3.1165061318,-0.0028635695,-0.109545072  
C,0,2.9985833869,-0.212747588,1.3199329194  
C,0,4.4453314631,-0.1231452373,-0.5213217008  
O,0,4.8347757848,-0.2063545226,-1.655316798  
O,0,5.2245211464,-0.1530055042,0.5718803075  
C,0,4.439121946,0.0505576489,1.7524416825  
H,0,4.790181433,-0.6478501409,2.5144713113  
H,0,4.5874669781,1.0833546316,2.0888948161  
H,0,2.2833988467,0.4819605788,1.7717704974  
H,0,2.6834475744,-1.2457502827,1.5351422623  
H,0,-0.9657352507,0.681176306,-1.5521502082  
C,0,-0.5756226658,-0.268033215,-1.1875627392  
H,0,-1.0033286865,-1.1435296972,-1.6762606132  
H,0,0.7904512111,-2.739915336,-0.7778701534  
C,0,1.673319559,-2.4731297486,-1.3639719955  
H,0,1.4012023037,-2.2510961116,-2.3974248912  
Zn,0,3.413161208,-3.2591860634,-0.8862787522  
Cl,0,2.0681207375,-4.8417624699,-1.9646352923  
C,0,5.1113496223,-3.457088804,0.0377100474  
H,0,5.5850413378,-4.4268437143,-0.1241983892  
H,0,5.8405386032,-2.665477787,-0.148085317  
Cl,0,4.7401276273,-3.388911767,1.8366317875

-----  
Sum of electronic and thermal Free Energies=  
-1702.885581 (Hartree/Particle)

One imaginary frequency -273.96.

### M-PC-B2

C,0,-3.3870411985,0.0923606494,-1.6179450476  
H,0,-3.8456024238,-0.8925262315,-1.5555273591  
H,0,-3.188442317,0.4331667317,-2.6316924035  
C,0,-2.4580366221,0.5250922809,-0.5501022169  
C,0,-1.5804169342,-0.058224487,0.4733406641  
H,0,-1.7440212627,0.2209920183,1.514911754  
N,0,-1.0754698481,-1.3960795859,0.3339142272  
C,0,-1.4179780219,-2.3424972757,-0.7088232277  
C,0,0.051745246,-1.7817018754,0.9782287081  
O,0,0.6907040579,-1.1254872294,1.7943090705  
O,0,0.3878410328,-3.0296776678,0.644852442  
C,0,-0.5734284101,-3.54658837,-0.2817523289  
H,0,-0.0329769417,-4.012217766,-1.109001497  
H,0,-1.1685570007,-4.307762861,0.2350061918  
H,0,-2.4884403433,-2.5719931269,-0.7126842625  
H,0,-1.1420409076,-1.9585584016,-1.7022653816  
H,0,-4.5320341806,0.8067000904,0.1621451092  
C,0,-3.8090194763,1.1171052568,-0.5886439816  
H,0,-3.8989347258,2.1529281202,-0.9071093386  
H,0,-0.3671701846,0.7382278631,-1.2336870955  
C,0,-1.078421564,1.0441456597,-0.4653354392  
H,0,-0.9215460223,2.0334085961,-0.0352016266  
Zn,0,1.3031720489,0.8691264215,1.4252156249  
Cl,0,0.3421804957,2.0371812195,2.9541668326



C,0,2.5221391755,0.7155044806,-0.1020869112  
H,0,2.577302245,1.6204308011,-0.7115652882  
H,0,3.5356873996,0.4507201581,0.2079536168  
Cl,0,2.0072956842,-0.615405469,-1.2471958356

-----  
Sum of electronic and thermal Free Energies=  
-1702.992655 (Hartree/Particle)  
No imaginary frequency.

### M-RC-B3

C,0,-0.0579444311,1.4183122041,2.6496730832  
H,0,-0.768882119,1.9607748751,3.2728439658  
H,0,0.648088563,2.0605234859,2.120735061  
C,0,-0.4877035635,0.1692095499,2.0257017116  
C,0,-1.2824662645,-0.4796426924,1.178049107  
H,0,-1.334174762,-1.5672698953,1.1415646383  
N,0,-2.1292004629,0.130891904,0.2647655221  
C,0,-2.2207704479,1.5582382111,0.0445878568  
C,0,-2.7107921854,-0.5859492217,-0.7708312982  
O,0,-2.6644372765,-1.7755543213,-0.9398137885  
O,0,-3.346487629,0.2822380576,-1.5843681313  
C,0,-3.302690175,1.6007469114,-1.0356716467  
H,0,-3.0814004498,2.3029947532,-1.8425874819  
H,0,-4.2898983833,1.834397998,-0.619321811  
H,0,-2.5167060696,2.0840314062,0.9590302787  
H,0,-1.2524957401,1.960956791,-0.2882095183  
H,0,0.0502977277,-0.2902823913,4.1134721745  
C,0,0.4305887615,0.0666889143,3.1570848369  
H,0,1.4760762395,-0.1897302317,2.9748278425  
H,0,0.4902666364,-3.0934971244,0.3072667511  
C,0,0.6547103007,-2.4599147747,-0.5696343758  
H,0,-0.2684126149,-2.4518649193,-1.1560680661  
Zn,0,1.3263187463,-0.6991910478,-0.1081172902  
Cl,0,1.9309004566,-3.2878760852,-1.5718071692  
C,0,2.3592592699,0.9450006095,0.0762374184  
H,0,2.5772714093,1.2425649092,1.10605111  
H,0,3.305175176,0.9045594722,-0.4690529326  
Cl,0,1.4248422878,2.3293646526,-0.665164848

-----  
Sum of electronic and thermal Free Energies=  
-1702.918166 (Hartree/Particle)  
No imaginary frequency.

### M-TS-B3

C,0,-3.3416312855,0.3382700379,-1.4908307376  
H,0,-3.9102560201,-0.4961272738,-1.9001439191  
H,0,-2.7744370813,0.8916426356,-2.2415469872  
C,0,-2.8067297766,0.2222964921,-0.1343961232  
C,0,-2.0998692853,-0.4988581975,0.7466061863  
H,0,-2.1479513961,-0.3240909636,1.8210048148  
N,0,-1.2213177117,-1.5025605008,0.3989654227  
C,0,-0.8992581922,-1.9074384334,-0.9548385545  
C,0,-0.251861645,-1.9441387843,1.2992041245  
O,0,-0.144405919,-1.615530506,2.4482632524  
O,0,0.5633388401,-2.8001533371,0.6532073482

C,0,0.0764961896,-3.0463445479,-0.6683133295  
H,0,0.9278567162,-3.0700063338,-1.3515334835  
H,0,-0.4201426214,-4.0238089542,-0.6777332295  
H,0,-1.7880454588,-2.2370118201,-1.5028091776  
H,0,-0.4421940613,-1.08214167,-1.5213069205  
H,0,-4.9192020703,0.8151813472,0.0452786472  
C,0,-3.9428757405,1.1174711463,-0.3302844384  
H,0,-3.7727586521,2.1943391696,-0.3152375365  
H,0,-1.5869773915,2.3187850088,0.7115564786  
C,0,-0.8835525217,1.6794485349,0.176397315  
H,0,-0.2588262243,1.1218390693,0.8802322496  
Zn,0,-0.2489725995,2.0349825598,-1.633934302  
Cl,0,0.7285652046,3.4658324323,-0.0398272793  
C,0,0.0279316529,1.8182193298,-3.5422474423  
H,0,-0.5193921082,2.5386736066,-4.1543296444  
H,0,1.0822862234,1.8669450394,-3.8227245549  
Cl,0,-0.5554838142,0.1663882931,-4.0749689192

-----  
Sum of electronic and thermal Free Energies=  
-1702.884876 (Hartree/Particle)  
One imaginary frequency -305.73.

### M-PC-B3

C,0,0.0159118604,0.7294043248,2.2700531787  
H,0,-0.8246134084,1.3306976345,2.6134714116  
H,0,0.9117066689,1.3081086387,2.0435591516  
C,0,-0.2968428477,-0.4771157579,1.4749882972  
C,0,-1.4529598116,-0.9207828521,0.6997077545  
H,0,-1.9379359559,-1.8580398846,0.9675639323  
N,0,-2.4136556335,0.0089037574,0.198754071  
C,0,-2.1080511587,1.2009487929,-0.5612808153  
C,0,-3.6987529209,-0.4209523095,-0.0661564679  
O,0,-4.1959694699,-1.4725629404,0.2381623801  
O,0,-4.3494103424,0.5607864485,-0.7426669961  
C,0,-3.5206949654,1.7174771229,-0.8107612493  
H,0,-3.6481205587,2.1848871614,-1.7901202771  
H,0,-3.8342804049,2.4245966274,-0.031839655  
H,0,-1.4910649924,1.9115366918,-0.0001128  
H,0,-1.5815824817,0.9580765706,-1.4988231994  
H,0,-0.5324208514,-0.9823334884,3.6088886375  
C,0,0.1847612725,-0.6547369149,2.8597256348  
H,0,1.1976149998,-1.0248563034,3.0178524738  
H,0,0.3369972623,-2.0317425857,-0.0215293587  
C,0,-0.053339889,-1.0213195644,0.0948453484  
H,0,0.1737176789,-0.3240976697,-0.7164818712  
Zn,0,2.5850305525,-0.499550457,0.4395379675  
Cl,0,3.0485934875,-2.4482716297,1.1241285678  
C,0,2.8070163101,1.3405861122,-0.1388941373  
H,0,2.9357384439,2.008439015,0.7170447935  
H,0,3.6991647519,1.4185483357,-0.7652367566  
Cl,0,1.4356444039,1.9958341238,-1.1127870163

-----  
Sum of electronic and thermal Free Energies=  
-1702.968405 (Hartree/Particle)  
No imaginary frequency.

### 3. Cartesian coordinates and energies of computed structures of Figure 4

#### M-RC-C

C,0,0.6607665404,-0.828619469,3.0932013504  
H,0,0.4963647628,-1.3791743761,4.0167892416  
H,0,1.3363266927,0.0255131092,3.1252866484  
C,0,0.0834618351,-1.1685969114,1.9792788943  
C,0,-0.4579878375,-1.5171822571,0.8363866345  
H,0,0.0588049264,-2.2073247788,0.1628187228  
N,0,-1.7214007883,-1.0053808369,0.4199716067  
C,0,-2.9645771344,-1.7400176044,0.593809848  
C,0,-1.8033249181,-0.200113289,-0.6854420243  
O,0,-0.8893725534,0.382401463,-1.2353021055  
O,0,-3.0754232543,-0.1372501512,-1.1084921382  
C,0,-3.9148479224,-0.8307174454,-0.177885011  
H,0,-4.3896063725,-0.0893563608,0.4756953206  
H,0,-4.6849867526,-1.3643285976,-0.7384309287  
H,0,-2.8915790436,-2.7484084019,0.1586472368  
H,0,-3.2322118351,-1.8341096244,1.6507089852  
H,0,1.2088456213,2.4962113792,1.7759640871  
C,0,0.4936658717,2.1597963732,1.0207371428  
H,0,-0.4324907596,1.8737006974,1.5301638196  
Zn,0,1.1349418136,0.8121796797,-0.2456710515  
Cl,0,0.0814667218,3.6388100523,0.0286877842  
C,0,2.2828020272,-0.3349912392,-1.3389172185  
H,0,3.1604122447,0.1577717828,-1.7632382965  
H,0,1.7370249858,-0.823880366,-2.150743313  
Cl,0,2.9445291283,-1.6921458276,-0.2965122357

-----  
Sum of electronic and thermal Free Energies=  
-1663.659853 (Hartree/Particle)  
No imaginary frequency.

#### M-TS-C1

C,0,0.875142335,0.0543730824,2.8782055953  
H,0,0.6425838677,-0.5284818858,3.7664023042  
H,0,1.7547456705,0.6898465262,2.9036102577  
C,0,0.0874699086,-0.0742781632,1.8087099499  
C,0,-0.6328609748,-1.0257747559,1.1424985732  
H,0,-0.304752096,-2.0659101684,1.144285269  
N,0,-1.8305905246,-0.7241897994,0.4300660934  
C,0,-3.1438269567,-1.2643764123,0.7445910941  
C,0,-1.7808757019,-0.344907667,-0.8690845083  
O,0,-0.7738373248,0.0078301386,-1.4787021614  
O,0,-2.9884118406,-0.3856164689,-1.4343286936  
C,0,-3.9585576834,-0.7147634329,-0.4260509714  
H,0,-4.4932431335,0.2044413721,-0.1613159232  
H,0,-4.6637895493,-1.4307100099,-0.8527083317  
H,0,-3.114775122,-2.3638056572,0.766894166  
H,0,-3.502217467,-0.9077399905,1.7151128448  
H,0,0.7879964,2.2942799043,1.7637839135  
C,0,0.0849759412,1.8461318701,1.0602162646  
H,0,-0.938461457,1.9934668686,1.4095322885  
Zn,0,0.9065308823,0.2858748683,-0.2428915027

Cl,0,0.173893731,2.923752889,-0.4723770805  
C,0,2.6828405562,-0.302051852,-0.80093544  
H,0,3.4821223445,0.409363676,-0.5847446408  
H,0,2.7330256392,-0.5708582112,-1.8580658887  
Cl,0,3.0897065554,-1.8199457209,0.128794528

-----  
Sum of electronic and thermal Free Energies=  
-1663.609276 (Hartree/Particle)  
One imaginary frequency -368.26.

#### M-IM-C

C,0,0.5618481519,-0.5400961098,3.157000854  
H,0,0.7730511037,-1.6008491084,3.2754568724  
H,0,0.8270566828,0.1117777605,3.9860254977  
C,0,0.0308740543,-0.0617769943,2.0252801167  
C,0,-0.2135562751,-0.8899156751,0.8147779054  
H,0,-0.0695380377,-1.9543439705,1.0522640996  
N,0,-1.5468146868,-0.6846580242,0.2737993471  
C,0,-2.783040155,-1.1377802234,0.882479885  
C,0,-1.7399128807,-0.4034469751,-1.0378618479  
O,0,-0.8653450763,-0.1533570564,-1.8588230382  
O,0,-3.0450878517,-0.4344637457,-1.3440349511  
C,0,-3.7963596219,-0.6169765826,-0.1342626727  
H,0,-4.2090577474,0.3560061093,0.1591680077  
H,0,-4.617399348,-1.3061340744,-0.3420032852  
H,0,-2.792193968,-2.234620895,0.9781362611  
H,0,-2.9215331678,-0.7076456083,1.8819276042  
H,0,-0.0648007899,1.9286592968,2.8525403389  
C,0,-0.3148521996,1.387609934,1.9378439111  
H,0,-1.3693890984,1.5487996098,1.6904606641  
Zn,0,1.0223158995,-0.3437738532,-0.6884953577  
Cl,0,0.596464212,2.2251556122,0.58843918  
C,0,2.6404715537,-0.1726348989,-1.7587593784  
H,0,3.2057231771,0.7409111099,-1.5582790584  
H,0,2.4549895814,-0.234056012,-2.8337503138  
Cl,0,3.7622074879,-1.5588916254,-1.3571026418

-----  
Sum of electronic and thermal Free Energies=  
-1663.719753 (Hartree/Particle)  
No imaginary frequency.

#### M-TS-C2

C,0,-0.5000163364,1.985157685,2.9846257412  
H,0,-0.6300251974,1.210560357,3.7358492676  
H,0,-0.3021707191,2.9976182476,3.3276365003  
C,0,-0.5519777391,1.6830115314,1.6700395881  
C,0,-0.4544902713,0.3691528357,1.0093807766  
H,0,-0.0107737852,-0.4355354844,1.6178517216  
N,0,-1.580593257,-0.0074811932,0.2247003981  
C,0,-2.8540016753,-0.4505284501,0.7777904417

C,0,-1.4414826705,-0.4646092781,-1.0550021749  
O,0,-0.430987432,-0.399012079,-1.7373314761  
O,0,-2.5943711803,-0.9761522623,-1.4973001121  
C,0,-3.6132392175,-0.7726903896,-0.5061129557  
H,0,-4.2445254019,0.0609760494,-0.835262974  
H,0,-4.2176247453,-1.6799092582,-0.4472106682  
H,0,-2.7008271874,-1.3331602129,1.416667599  
H,0,-3.3294904507,0.3365619668,1.3736235714  
H,0,0.3305555577,3.4522446401,0.6834055575  
C,0,-0.2861145776,2.5589283186,0.5953411802  
H,0,-0.750649047,2.3876326319,-0.3734520356  
Zn,0,1.2733627249,0.1377345334,-0.4353983167  
Cl,0,1.9987851016,2.1763268303,-1.0544175069  
C,0,2.1420451412,-1.6100701516,-0.0833314044  
H,0,3.0423968785,-1.571310127,0.5331551255  
H,0,2.376245583,-2.133054581,-1.0140733647  
Cl,0,0.9825799041,-2.7116331599,0.8094865202

-----  
Sum of electronic and thermal Free Energies=  
-1663.654758 (Hartree/Particle)  
One imaginary frequency -368.03.

### M-TS-C3

C,0,-1.1693521091,2.0845708379,-1.617490536  
H,0,-2.024181536,1.4106202037,-1.7303527755  
H,0,-1.3245903729,3.143765658,-1.795471303  
C,0,0.0575007441,1.5982925521,-1.178552136  
C,0,0.4009518397,0.2185561493,-1.061644217  
H,0,0.0702121025,-0.4191779221,-1.8872049023  
N,0,1.7297495095,-0.0569689073,-0.5951021753  
C,0,2.9262185999,-0.0008178382,-1.4207846928  
C,0,1.924647753,-0.9292723624,0.434891088  
O,0,1.0676294519,-1.3611655555,1.1916032513  
O,0,3.2140091767,-1.2834778673,0.5191688197  
C,0,3.9673273744,-0.5250482354,-0.4371306172  
H,0,4.4770027758,0.2874592257,0.0944299679  
H,0,4.7138678261,-1.1841719285,-0.8849155768  
H,0,2.8155831654,-0.6387929544,-2.3111847316  
H,0,3.1384278927,1.0218831213,-1.7546871245  
H,0,0.3217833214,3.6644093777,-0.5542515622  
C,0,0.5570584685,2.6234241233,-0.3568669014  
H,0,1.1616555289,2.396104999,0.5160237958  
Zn,0,-0.8269609418,-0.4094734963,0.6550268293  
Cl,0,-0.756190568,1.4337266086,1.9990089749  
C,0,-2.4194598524,-1.5116866055,0.2580235729  
H,0,-3.279604858,-1.3198407811,0.9028577464  
H,0,-2.2497473035,-2.589875726,0.2150515252  
Cl,0,-2.9960009891,-1.0622316765,-1.4393753198

-----  
Sum of electronic and thermal Free Energies=  
-1663.667333 (Hartree/Particle)  
One imaginary frequency -351.64.

### M-PC-C

C,0,0.6712328805,-3.1787355064,2.5369537205  
H,0,1.4368990312,-2.8274234014,3.2262207097  
H,0,0.3232076096,-4.201582918,2.6602812623  
C,0,0.1815146502,-2.3929386376,1.5973154726  
C,0,0.2463934518,-1.0621822331,0.9791592791  
H,0,-0.1695787356,-0.203909267,1.5185011443  
N,0,1.4024800263,-0.7726929544,0.1860582781  
C,0,2.7136638812,-0.5817157814,0.7792973821  
C,0,1.3311690677,-0.1056294691,-0.9952055106  
O,0,0.3301541184,0.1212809271,-1.6647748955  
O,0,2.550882503,0.2573251479,-1.3998827621  
C,0,3.5221014699,-0.2394847367,-0.467253936  
H,0,3.9948223222,-1.125052449,-0.9079151505  
H,0,4.2744917981,0.5361268581,-0.3128628127  
H,0,2.6896114747,0.2419854557,1.5094010099  
H,0,3.0575432329,-1.4935605794,1.2784458712  
H,0,-1.7697470259,-1.9956722655,0.6340070318  
C,0,-0.7031029281,-2.1495701108,0.4726825764  
H,0,-0.4658269699,-2.5805911054,-0.4997434851  
Zn,0,-1.5239220647,0.8288459643,-0.9681612152  
Cl,0,-2.9731751682,-0.5606443225,-1.7304322201  
C,0,-1.1276481686,2.4620209582,0.0405139161  
H,0,-1.7860438323,2.6065588587,0.900058352  
H,0,-1.1949909827,3.3520895345,-0.5898888387  
Cl,0,0.5706233582,2.4748410333,0.7153988204

-----  
Sum of electronic and thermal Free Energies=  
-1663.733877 (Hartree/Particle)  
No imaginary frequency.

#### 4. Cartesian coordinates and energies of computed structures of Figures 5 and 6

##### D-RC1

C,0,-6.2321260543,-1.944764217,-1.0081146336  
H,0,-6.9526416446,-1.7481768142,-1.8019596591  
H,0,-6.5233513098,-2.6739382939,-0.2524575912  
C,0,-5.0748557875,-1.3474104413,-0.967410082  
C,0,-3.9055794972,-0.7568467955,-0.9492620615  
H,0,-3.0308086087,-1.1726957151,-1.4484758135  
N,0,-3.6695895137,0.4656402813,-0.3035241034  
C,0,-4.6581257597,1.1613843337,0.4964921363  
C,0,-2.4222614665,0.8875013183,0.0242771991  
O,0,-1.3592993224,0.3984846436,-0.3397449473  
O,0,-2.4869163601,1.9695922453,0.802651572  
C,0,-3.8545856411,2.396002497,0.8897437597  
H,0,-4.0399376177,2.7440918064,1.9069106262  
H,0,-3.9901490807,3.2200221945,0.1789271112  
H,0,-5.5499306725,1.3966998382,-0.0931208796  
H,0,-4.9511032463,0.5398078354,1.3558819223  
Zn,0,0.5093107335,1.787702007,0.0073893457  
C,0,6.2333634007,1.9413887767,-1.0118965366  
H,0,6.9545122705,1.7421063705,-1.8044961899  
H,0,6.5239034515,2.6732977534,-0.2586266569  
C,0,5.0761965204,1.3439183537,-0.9699111446  
C,0,3.9069914937,0.7532455381,-0.9506520769  
H,0,3.0325676696,1.167208408,-1.4520302757  
N,0,3.6706971842,-0.4670479409,-0.3008829218  
C,0,4.6587721014,-1.1600767012,0.5020068973  
C,0,2.4231755427,-0.887691522,0.0278039184  
O,0,1.3604592412,-0.3997873307,-0.3384323476  
O,0,2.4873502229,-1.967066681,0.8099337495  
C,0,3.8549724607,-2.3932986479,0.8990875491  
H,0,4.0398157815,-2.7379902256,1.9174979028  
H,0,3.9907428828,-3.2197412466,0.1911288701  
H,0,5.5508856997,-1.39746634,-0.0863011048  
H,0,4.9513283005,-0.5355955013,1.3594395032  
Zn,0,-0.5080180086,-1.7878256886,0.0137472874  
C,0,-0.7324834647,-1.7641920643,1.965379559  
H,0,-0.0017044309,-1.1151293507,2.4595008574  
H,0,-0.6767299902,-2.7496056641,2.4346927656  
C,0,-0.4197091154,-2.4217140387,-1.8435910381  
H,0,-1.1836026056,-3.1309207125,-2.1730824359  
H,0,-0.4038290512,-1.5774257873,-2.5419826429  
C,0,0.7330799566,1.7711096746,1.9591936209  
H,0,0.0017247204,1.1243410152,2.4554888629  
H,0,0.6778667497,2.758264734,2.4248910822  
C,0,0.420514761,2.4150621223,-1.8521596765  
H,0,1.184385494,3.1230557804,-2.1843082631  
H,0,0.4046131029,1.5682409373,-2.5474767879  
Cl,0,1.1775331389,-3.2923299061,-2.104132171  
Cl,0,-2.3779247929,-1.1061243099,2.4612813064  
Cl,0,-1.1767077478,3.2847156147,-2.1157226284  
Cl,0,2.3779626458,1.1138252357,2.4581201175

Sum of electronic and thermal Free Energies=  
-3327.344463 (Hartree/Particle)  
No imaginary frequency.

##### D-TS1

C,0,4.574419606,2.1188698869,1.8288536014  
H,0,4.1771784508,2.5630931399,2.7404585866  
H,0,5.6231420625,2.3174918276,1.6064174236  
C,0,3.8436809787,1.3963913383,1.0237609393  
C,0,3.3377223881,0.6407604776,0.0513503026  
H,0,2.865087928,1.0641696158,-0.8413401992  
N,0,3.4054968705,-0.7377177571,0.0735151168  
C,0,4.0900231195,-1.5195010008,1.0824902294  
C,0,2.5989013723,-1.5287965328,-0.7150689207  
O,0,1.7608459054,-1.1394492474,-1.4998172544  
O,0,2.8942933561,-2.8115749254,-0.4966078343  
C,0,3.8612328453,-2.9397485519,0.5530562019  
H,0,4.7662270036,-3.382849803,0.1259586065  
H,0,3.4443865299,-3.6087020558,1.3103829031  
H,0,1.3875279438,0.5184359946,1.8901986579  
C,0,1.5193052119,1.519663211,1.456544914  
H,0,1.9469881814,2.2134878578,2.1842884278  
Zn,0,0.3329243957,2.1897863334,0.0245410908  
Cl,0,-0.8309755139,2.4579942583,2.0878130049  
H,0,3.6301276291,-1.3548384907,2.0674395719  
C,0,0.2191243005,2.9715962857,-1.7601968998  
H,0,-0.7470295448,2.8095577313,-2.2434360043  
H,0,0.4873332879,4.026513292,-1.8492125105  
Cl,0,1.4379544314,2.0657084546,-2.8022227861  
H,0,5.148822552,-1.2445246172,1.1393651631  
C,0,-4.2487770986,-1.5610931219,3.7415185055  
H,0,-4.4535850116,-0.9557045687,4.6244208491  
H,0,-4.7651240591,-2.5187860626,3.6754746901  
C,0,-3.4212315834,-1.1642650534,2.8162077147  
C,0,-2.5742010285,-0.7653717785,1.8999133924  
H,0,-1.5058990454,-0.9810742884,1.944539207  
N,0,-2.9618892202,0.0136939333,0.7985305892  
C,0,-4.2042935303,0.762268894,0.7580901769  
C,0,-2.0744117458,0.5189557795,-0.08713651  
O,0,-0.8859139823,0.2107949232,-0.2018945482  
O,0,-2.6515129675,1.4410498099,-0.8575685127  
C,0,-4.061015465,1.4668328754,-0.586893044  
H,0,-4.5576475264,0.922798948,-1.3984811716  
H,0,-4.3866205723,2.5082170136,-0.5770747905  
H,0,-4.2350489681,1.453370928,1.6131359565  
H,0,-5.071706721,0.0960587687,0.8038619041  
Zn,0,-0.4226572421,-1.8267583492,-1.2618361525  
C,0,-1.2089932612,-1.2005458335,-2.9417448617  
H,0,-0.9815330242,-0.1425085917,-3.1149846297  
H,0,-0.97744813,-1.7629129384,-3.8484002638  
C,0,-0.2330479214,-3.0119414067,0.3101813573  
H,0,0.3083825316,-3.9369495946,0.0932256464

H,0,-1.1902169649,-3.2835882987,0.7656745819  
Cl,0,0.7148334364,-2.2465253602,1.7004001414  
Cl,0,-3.0451981906,-1.29697235,-2.7731515599

-----  
Sum of electronic and thermal Free Energies=  
-3327.299052 (Hartree/Particle)  
One imaginary frequency -254.39.

### D-TS2

C,0,-5.6406371414,0.3151595258,2.58416568  
H,0,-5.9634410495,-0.2555496254,3.4549130201  
H,0,-6.34044633,1.0552087584,2.1968494653  
C,0,-4.4727166273,0.1284106962,2.0381317262  
C,0,-3.2879179224,-0.0619899532,1.5116388776  
H,0,-2.4025015396,0.4851523517,1.8336834662  
N,0,-3.0381842857,-0.9990751508,0.5025419283  
C,0,-4.033178518,-1.8790700071,-0.0728648245  
C,0,-1.8987309555,-1.0212772546,-0.2187621414  
O,0,-0.9172609505,-0.2897121517,-0.0666634579  
O,0,-1.9440579197,-1.9750367247,-1.1451307807  
C,0,-3.1460434628,-2.7437518772,-0.9674535292  
H,0,-3.5706599275,-2.9362503034,-1.9542851544  
H,0,-2.8629493616,-3.6856406126,-0.4846241559  
H,0,-4.5427867289,-2.452517449,0.7084398316  
H,0,-4.7760502669,-1.2923953574,-0.6319535921  
Zn,0,0.9628048227,-1.5596903862,0.109421487  
C,0,3.567876641,0.6241985502,3.6056549966  
H,0,4.2515116357,1.3676282087,4.0161919464  
H,0,3.3891261987,-0.2630335793,4.212128192  
C,0,2.9910347503,0.809259364,2.4508003176  
C,0,2.4805026287,1.1900204977,1.2841301166  
H,0,1.5723047288,1.7939222005,1.2328479174  
N,0,3.0773342326,0.9642587135,0.0596103371  
C,0,4.2840653446,0.1840296042,-0.1424654742  
C,0,2.4133638234,1.1741932213,-1.1338627178  
O,0,1.3062865543,1.6418959449,-1.2799074417  
O,0,3.1944010562,0.7791962314,-2.1408002709  
C,0,4.4761616394,0.3558705757,-1.6473515417  
H,0,4.7319425521,-0.5786141622,-2.1509389802  
H,0,5.2045073471,1.1368140403,-1.8913149283  
H,0,5.1152398972,0.5842255541,0.4472827022  
H,0,4.1091004507,-0.8658208049,0.1378309565  
Zn,0,-0.9633252365,1.9880600916,-0.8067137434  
C,0,-1.6679996299,1.4538172479,-2.5523255032  
H,0,-1.1298732704,0.5918045523,-2.9601061551  
H,0,-1.7286847955,2.2241902151,-3.3234715259  
C,0,-0.8507030268,2.8594871775,0.94971419  
H,0,-1.7643680267,3.3884555136,1.2353702334  
H,0,-0.6154563894,2.1582647482,1.7609885796  
C,0,1.4122559168,-2.0953861851,-1.7153386661  
H,0,1.3727481249,-1.2824264216,-2.4467021895  
H,0,0.773149103,-2.9072259009,-2.0702602801  
C,0,1.3964010284,-0.8594784445,1.9078084245  
H,0,2.0820064496,-1.4026175128,2.5634190551  
H,0,0.6445469872,-0.3148524562,2.4863902661  
Cl,0,0.4748902137,4.1209183251,0.9952790928

Cl,0,-3.4034578473,0.8737636645,-2.3182362126  
Cl,0,-0.1478196552,-2.8656856893,1.7837962537  
Cl,0,3.1246297375,-2.7615745645,-1.8067937933

-----  
Sum of electronic and thermal Free Energies=  
-3327.305388 (Hartree/Particle)  
One imaginary frequency -289.07.

### D-PC1

C,0,6.0763750791,1.791318207,1.7446291811  
H,0,6.5137539902,2.0304848367,2.7112794282  
H,0,6.7606629751,1.6669006805,0.9071425659  
C,0,4.7716164119,1.6690554567,1.5909824037  
C,0,3.6872562034,1.3724281603,0.6440846804  
H,0,3.4004352642,2.1122596211,-0.1101054918  
N,0,3.5507747953,0.0066863922,0.2310887066  
C,0,4.5195248356,-0.6690652323,-0.6121873544  
C,0,2.3558076468,-0.6092684304,0.1484435805  
O,0,1.2700646083,-0.2026377695,0.5590059421  
O,0,2.4790666767,-1.8144288924,-0.4220320693  
C,0,3.8618620522,-2.0412669049,-0.7450429376  
H,0,3.9095833678,-2.4582834291,-1.7528639887  
H,0,4.2619287692,-2.7668009978,-0.0280622132  
H,0,3.06675665,0.846967838,2.7245903608  
C,0,3.416572675,1.6788049283,2.1119508576  
H,0,2.9099249502,2.6206339272,2.3199113548  
Zn,0,0.2238442071,1.7430820901,0.0533558733  
Cl,0,0.2944007459,3.1106931621,1.7409058143  
H,0,5.5003829535,-0.7091788709,-0.1271099264  
C,0,0.3122604199,1.6739117969,-1.9153944049  
H,0,-0.5048956417,1.0794440409,-2.3379497907  
H,0,0.2956960266,2.6601616239,-2.3843385138  
Cl,0,1.8505269184,0.8854000536,-2.543303611  
H,0,4.6156333938,-0.1489152387,-1.5770727027  
C,0,-5.6414301213,-2.6219398197,2.1217628606  
H,0,-6.4048686969,-2.4596050735,2.8824394585  
H,0,-5.7482716647,-3.5113056743,1.501578637  
C,0,-4.6424355139,-1.8000196129,1.9666832726  
C,0,-3.6376370424,-0.9674363378,1.8466139001  
H,0,-2.7086832876,-1.0696638112,2.4128840404  
N,0,-3.6880238665,0.1687101447,1.019668365  
C,0,-4.8576128195,0.5836136728,0.2714943177  
C,0,-2.5775829601,0.7500975846,0.5125592519  
O,0,-1.4137303671,0.4432041983,0.7612209491  
O,0,-2.8975644864,1.7495321729,-0.3065429861  
C,0,-4.3289640299,1.8595521649,-0.3846487435  
H,0,-4.6002946351,1.9528829091,-1.4381132119  
H,0,-4.6262373543,2.7646839359,0.1548992752  
H,0,-5.7072169578,0.7604653249,0.9391533012  
H,0,-5.1331122913,-0.1941434841,-0.4557108427  
Zn,0,-0.5077385965,-1.7327907029,0.4498537819  
C,0,-0.8842386736,-1.7897768972,-1.4843672505  
H,0,-0.2317535867,-1.1245601093,-2.0601340965  
H,0,-0.8116702215,-2.7897394114,-1.9197940708  
C,0,-0.2672151182,-2.4548924065,2.2623850975  
H,0,0.7140433254,-2.9296711211,2.3678920833

H,0,-1.0187785474,-3.1902024334,2.5656389656  
Cl,0,-0.3141498035,-1.1453281718,3.5327365605  
Cl,0,-2.5998776577,-1.2455030905,-1.8769166606

-----  
Sum of electronic and thermal Free Energies=  
-3327.415069 (Hartree/Particle)  
No imaginary frequency.

### D-RC-B1

C,0,-4.692674754,-1.459244145,-1.4545634129  
H,0,-5.2438403234,-1.3905384248,-2.390204905  
H,0,-5.1978004271,-1.8941532117,-0.5925781819  
C,0,-3.436997709,-1.047320552,-1.3670968999  
C,0,-2.2645541766,-0.908950384,-0.4923647842  
H,0,-2.2403162387,-0.1195524472,0.2717560143  
N,0,-1.552943174,-2.0958178309,-0.1321932214  
C,0,-2.1106772919,-3.1561176255,0.6935007809  
C,0,-0.2083613025,-2.0737761899,-0.0016278949  
O,0,0.5635029849,-1.1902322476,-0.3678453277  
O,0,0.2316931593,-3.1996859899,0.5705789541  
C,0,-0.8916594658,-4.0644791189,0.8251359241  
H,0,-0.7673825576,-4.4958126328,1.8199807977  
H,0,-0.8799571758,-4.8624398751,0.0743812482  
H,0,-1.636973219,-1.1134000455,-2.6228747782  
C,0,-2.2332670027,-0.4889332284,-1.9573327278  
H,0,-2.1445207738,0.5803681157,-2.1535451279  
Zn,0,0.5495678645,1.0463362083,0.1486376567  
Cl,0,-0.1208889941,2.2147861989,-1.5641725076  
H,0,-2.9586971187,-3.6375795756,0.1963313756  
C,0,0.4042110184,0.9544390488,2.1080459592  
H,0,1.3772582474,0.7553788055,2.5697214464  
H,0,-0.0067697459,1.8630246775,2.5538156863  
Cl,0,-0.7025300009,-0.3936145894,2.6815067448  
H,0,-2.4496349164,-2.7537447593,1.6576162512  
C,0,7.9025051559,0.0413146544,-1.4479798676  
H,0,8.5358276229,0.5527502059,-2.1726231656  
H,0,8.389612369,-0.681430991,-0.7943104469  
C,0,6.6225318012,0.2731318073,-1.3737655069  
C,0,5.3345848086,0.5123270298,-1.3357415183  
H,0,4.6089698058,-0.0295660805,-1.9474034404  
N,0,4.7764640802,1.5337121471,-0.5457417102  
C,0,5.5475313679,2.4714647442,0.2470925117  
C,0,3.4910198884,1.5170717592,-0.1295426811  
O,0,2.6356186065,0.6852755017,-0.4289589901  
O,0,3.2346980921,2.5572841119,0.6608616902  
C,0,4.4266265348,3.3499946993,0.8019232998  
H,0,4.5436462384,3.5928726607,1.8595928241  
H,0,4.2879856836,4.2699232825,0.2243976218  
H,0,6.258468657,3.0202102357,-0.3788336417  
H,0,6.1029803244,1.9335271787,1.0291341495  
Zn,0,2.8738110059,-1.6784110703,-0.0885840251  
C,0,3.0555961536,-1.5470023848,1.8674469831  
H,0,2.1098307213,-1.2917697977,2.3582554242  
H,0,3.4413126972,-2.4557437531,2.3367420966  
C,0,3.1386398106,-2.4298729524,-1.8817363082  
H,0,2.5125802281,-3.3173429121,-2.0223869226

H,0,4.1694276917,-2.7188240722,-2.108340144  
Cl,0,2.6462068491,-1.2703342054,-3.2011735652  
Cl,0,4.2395240848,-0.2318553279,2.3746108813  
Zn,0,-4.7295968427,1.0962947525,0.2752960751  
C,0,-3.8841300725,2.3763445254,-0.910670818  
H,0,-2.8142368232,2.548812741,-0.7520454775  
H,0,-4.0419444927,2.1556771269,-1.9706225967  
Cl,0,-4.7359879393,3.9574824124,-0.5814995846  
C,0,-5.7528699472,0.123275691,1.6182501595  
H,0,-6.7435219378,-0.1736892277,1.2626166398  
H,0,-5.8821088449,0.7008953595,2.5367134974  
Cl,0,-4.9217132852,-1.4202500331,2.1200474863

-----  
Sum of electronic and thermal Free Energies=  
-4553.434502 (Hartree/Particle)  
No imaginary frequency.

### D-TS-B1

C,0,6.1957203017,0.2944874168,-1.9597487601  
H,0,6.5620631624,0.650402126,-2.9205016833  
H,0,6.9131963515,0.2901273985,-1.1409011248  
C,0,4.9019551876,0.030055378,-1.7620393063  
C,0,3.877328202,-0.3282740985,-0.7715670419  
H,0,3.8083813125,-1.3579673292,-0.4019135872  
N,0,3.5333809542,0.6812023223,0.1818583517  
C,0,4.4231212501,1.0805842346,1.2581864607  
C,0,2.2494359159,0.9393402858,0.520566128  
O,0,1.2324000059,0.554549754,-0.0493616049  
O,0,2.196756024,1.7527671727,1.5804390241  
C,0,3.5340701695,2.0814378434,1.9939968634  
H,0,3.5824854558,1.9981720477,3.0812478113  
H,0,3.7357963655,3.1155473293,1.6944916042  
H,0,2.98283949,0.8575102663,-2.4464036821  
C,0,3.5328008153,-0.0596403921,-2.2305298248  
H,0,3.1913700993,-0.9203896596,-2.8070175077  
Zn,0,0.5417313824,-1.5838702632,-0.4550507437  
Cl,0,0.7615493821,-2.012639396,-2.5776262889  
H,0,5.3385729414,1.5342993638,0.8640260838  
C,0,0.7992978806,-2.3818291533,1.3267056183  
H,0,-0.0564022445,-2.2034841612,1.9864256576  
H,0,0.9856341435,-3.4573273344,1.291723562  
Cl,0,2.2490839155,-1.6859416856,2.218996409  
H,0,4.691948834,0.2126775195,1.8785552696  
C,0,-6.1436714261,2.0150279511,-0.6565636864  
H,0,-6.8847382635,2.0281804525,-1.455567911  
H,0,-6.4054281684,2.5354297831,0.2641228823  
C,0,-4.9948332733,1.4172185181,-0.7983161899  
C,0,-3.8387909981,0.8264381404,-0.9763987798  
H,0,-2.9703586082,1.3316091318,-1.4050895919  
N,0,-3.6281518148,-0.5322172075,-0.6839004134  
C,0,-4.6572113788,-1.443885069,-0.2265035127  
C,0,-2.4025360451,-1.0468633845,-0.4504108453  
O,0,-1.3316157213,-0.4460503429,-0.5284895841  
O,0,-2.4791553191,-2.3374501695,-0.1354980678  
C,0,-3.8586611355,-2.7462715033,-0.1362547023  
H,0,-4.0410574012,-3.3063993407,0.7828618456

H,0,-4.0143025928,-3.3975292823,-1.0022781392  
H,0,-5.4824939227,-1.4928071358,-0.9444688413  
H,0,-5.0522645507,-1.1093652174,0.7434135599  
Zn,0,-0.8041382346,1.5194943526,0.7290712203  
C,0,-1.0177447054,0.6407151516,2.4762439944  
H,0,-0.2386986002,-0.1011603659,2.6803458195  
H,0,-1.0469884053,1.3366692905,3.3185961743  
C,0,-0.8565050298,2.9934089661,-0.5668264132  
H,0,-0.0197448443,3.6836002949,-0.416814165  
H,0,-1.7749801076,3.5873493414,-0.5297200587  
Cl,0,-0.7102346062,2.4141199656,-2.290412706  
Cl,0,-2.6099296122,-0.277926202,2.5860246921  
Zn,0,8.2955248733,-2.1570231932,-2.6246517221  
C,0,6.3422079458,-1.9625313309,-2.4860858242  
H,0,5.8067554347,-2.3611556623,-1.6215724458  
H,0,5.6950710998,-1.8943278344,-3.3624355841  
Cl,0,7.1779569874,-4.1445316552,-3.1332526557  
C,0,10.1244487398,-1.533424035,-2.4852175586  
H,0,10.6410190226,-1.4544361343,-3.4441027044  
H,0,10.7432782632,-2.1282482662,-1.8101727783  
Cl,0,10.0880053504,0.1571640871,-1.7863752251

-----  
Sum of electronic and thermal Free Energies=  
-4553.397506 (Hartree/Particle)  
One imaginary frequency -314.63.

#### D-PC-B1

C,0,-4.3748080487,-0.4313193397,-1.3452186312  
H,0,-4.5163894346,-0.4110636216,-2.4243339976  
H,0,-4.6107835764,-1.3771469592,-0.8531429131  
C,0,-3.2869324807,0.3816581741,-0.77778659  
C,0,-2.1205967004,0.1542191126,0.1036895716  
H,0,-2.0585796901,0.712107203,1.0433902879  
N,0,-1.5671443977,-1.1657925277,0.1633179437  
C,0,-2.1996337835,-2.2282428216,0.930914872  
C,0,-0.2315601456,-1.3793363464,0.1148964552  
O,0,0.6480557811,-0.598785912,-0.2401471235  
O,0,0.0618926593,-2.6354876558,0.472312851  
C,0,-1.1494769583,-3.3287095634,0.811767066  
H,0,-0.9776030021,-3.8767420636,1.7402290931  
H,0,-1.3741931971,-4.0346979661,0.0046964192  
H,0,-1.443545351,0.4028546243,-1.9977510308  
C,0,-1.9834781877,0.9125332358,-1.2013377159  
H,0,-1.7795984898,1.9783133853,-1.1318759673  
Zn,0,1.1904657281,1.435966812,0.6096474141  
Cl,0,0.7537028309,2.9695739585,-0.869964008  
H,0,-3.1648466225,-2.5163920024,0.5031249393  
C,0,1.154257303,1.0696659375,2.5461091586  
H,0,2.1348075713,0.7450504591,2.9097178417  
H,0,0.8412543645,1.9325713819,3.1381737327  
Cl,0,-0.0005669012,-0.2735450154,3.0349969361  
H,0,-2.3622010766,-1.9028678599,1.9700905225  
C,0,7.9586182183,-0.5357287543,-2.2528362498  
H,0,8.5613575158,0.0084653465,-2.9797336148  
H,0,8.3908301952,-1.4478498298,-1.8425389498  
C,0,6.7735221562,-0.124686915,-1.9003790328

C,0,5.5760355761,0.2982785136,-1.5775745284  
H,0,4.6739022052,0.0175604159,-2.1255013516  
N,0,5.3470497416,1.2011236436,-0.5258027596  
C,0,6.3866436023,1.8034172491,0.2827378801  
C,0,4.1416934377,1.3437816976,0.0658159568  
O,0,3.0998409098,0.7730886258,-0.25157822  
O,0,4.2050298109,2.2228937743,1.0647555246  
C,0,5.549200973,2.7205213131,1.1763041729  
H,0,5.8345701949,2.6802539182,2.2293301553  
H,0,5.5521322677,3.7598695077,0.8326001837  
H,0,7.1031588192,2.3459046483,-0.3429804233  
H,0,6.9256999506,1.0258991231,0.8428922534  
Zn,0,2.8171411827,-1.6079010875,-0.3225938847  
C,0,3.2334403912,-1.8393856709,1.5862095208  
H,0,2.4687398206,-1.4092996503,2.2412780403  
H,0,3.376852451,-2.8826309714,1.8795070107  
C,0,2.7323536542,-2.0804214908,-2.2251835657  
H,0,1.923657083,-2.795377355,-2.4102897749  
H,0,3.6516474056,-2.5186718361,-2.6253143965  
Cl,0,2.3652878722,-0.6413761239,-3.2832999111  
Cl,0,4.8085590019,-1.010450696,2.0577603313  
Zn,0,-7.0258286991,-0.3132416766,-0.8979531501  
C,0,-4.6578192487,0.8798666324,-0.5780446495  
H,0,-5.0567525592,0.8065080987,0.4362112576  
H,0,-4.9843875858,1.7366733715,-1.1650906929  
Cl,0,-7.5094263762,0.5656486379,-2.7661246469  
C,0,-7.2529390558,-1.2431744672,0.7977286457  
H,0,-7.7411335644,-2.2093218983,0.6498018429  
H,0,-7.8694747136,-0.6541159728,1.48119914  
Cl,0,-5.7055388281,-1.5807507506,1.6762367562

-----  
Sum of electronic and thermal Free Energies=  
-4553.500370 (Hartree/Particle)  
No imaginary frequency.

#### D-RC2

C,0,5.1425809778,1.9263240456,1.9278914561  
H,0,5.4934462323,2.6005967212,2.7093072718  
H,0,5.9075105109,1.3799719703,1.3745185485  
C,0,3.8725806121,1.7926873162,1.6633972974  
C,0,2.5791083567,1.6932080791,1.4534629841  
H,0,1.9527820271,0.9773392891,1.9871201342  
N,0,1.8767865728,2.4877082115,0.5440885328  
C,0,2.5042072308,3.4354327327,-0.3624144027  
C,0,0.6320856883,2.1600609668,0.1045361863  
O,0,-0.109977083,1.2945957889,0.5487688637  
O,0,0.2847529294,2.9493267201,-0.9164051085  
C,0,1.2711714537,3.9826168217,-1.0719655964  
H,0,1.4161447068,4.1561973603,-2.1391651388  
H,0,0.8800520979,4.8891897271,-0.5956842763  
H,0,3.0562780956,4.201650732,0.1909600642  
H,0,3.1983857197,2.9073090066,-1.0322608767  
Zn,0,-2.3223106653,1.6623255891,-0.274413542  
C,0,-7.7505502774,-0.478411237,0.0661442692  
H,0,-8.4718761779,-0.8366498609,0.8005497678  
H,0,-8.1546895834,-0.0800972215,-0.8641595078

C,0,-6.4677554507,-0.5142545801,0.2914949899  
C,0,-5.1815660263,-0.538079915,0.5390221029  
H,0,-4.6600191255,0.2867477934,1.0238360216  
N,0,-4.3569494345,-1.6270784214,0.2221960223  
C,0,-4.8053829501,-2.7989196535,-0.5038245154  
C,0,-3.0070342913,-1.5204884116,0.1525393447  
O,0,-2.321928931,-0.5689302,0.5105563816  
O,0,-2.4768644502,-2.6368975578,-0.3506634356  
C,0,-3.5162823572,-3.6139375568,-0.513040478  
H,0,-3.3358476772,-4.1510701503,-1.4454204357  
H,0,-3.4577256968,-4.3053401701,0.335445182  
H,0,-5.6268253385,-3.2979842606,0.0201132163  
H,0,-5.146646058,-2.5089507395,-1.508885429  
Zn,0,-0.0368769821,-1.1513397842,0.7446600248  
C,0,0.4836918261,-1.3174593487,-1.1421147669  
H,0,-0.2862048015,-0.9457459203,-1.8264666796  
H,0,0.7649281452,-2.3279639796,-1.4465174187  
C,0,-0.2928825433,-1.3510009706,2.6778186425  
H,0,0.5843351807,-1.5899758328,3.2850863821  
H,0,-0.7859932713,-0.4711835208,3.1048455863  
C,0,-2.1736245433,1.2200109984,-2.1841889921  
H,0,-1.1619148121,0.9049637332,-2.4633956462  
H,0,-2.4596010868,2.0410130275,-2.8469374651  
C,0,-2.8312080079,2.589222915,1.38066761  
H,0,-3.8562567585,2.9651157204,1.4391355482  
H,0,-2.6430700682,1.960319437,2.257420443  
Cl,0,-1.4511407829,-2.7463964135,2.9620031931  
Cl,0,1.9704171241,-0.2890501911,-1.5564735866  
Cl,0,-1.7710901347,4.0701641822,1.6148268883  
Cl,0,-3.2673701573,-0.1755070276,-2.6716440767  
H,0,3.9404096107,-2.0708203662,2.4040286556  
C,0,3.2263586384,-1.80134534,1.6211225888  
H,0,2.4029921267,-1.2557737942,2.0930026756  
Zn,0,4.0542272646,-0.8771180068,0.1116755339  
Cl,0,2.5037612743,-3.3725449865,1.0369745093  
C,0,5.4043821469,-0.3614909892,-1.2108450343  
H,0,6.4323858794,-0.4508523752,-0.8485618442  
H,0,5.3123404543,-0.9708214911,-2.1147057517  
Cl,0,5.2372086405,1.3667773888,-1.773850914

-----  
Sum of electronic and thermal Free Energies=  
-4553.375082 (Hartree/Particle)

No imaginary frequency.

### D-TS3

C,0,0.0160569283,-0.2155275033,0.0093874929  
H,0,-0.068888281,-0.2855789754,1.0927489231  
H,0,1.0189241582,-0.210682705,-0.4145798889  
C,0,-1.0440035833,-0.1463296941,-0.7490055606  
C,0,-2.2755887765,-0.0637522069,-1.2533922099  
H,0,-2.8310646709,-0.938084073,-1.5953717935  
N,0,-2.9179095873,1.1415008146,-1.4469676651  
C,0,-2.6725161077,2.3635592558,-0.698687585  
C,0,-3.9072738327,1.2996410295,-2.3803967933  
O,0,-4.2712392727,0.4532510186,-3.1802159691  
O,0,-4.4275649669,2.5170705161,-2.286663897  
C,0,-3.6326031978,3.3301424926,-1.4018656746

H,0,-3.0943925147,4.0621654152,-2.0141499126  
H,0,-4.3126497883,3.8429165627,-0.7192959135  
H,0,-2.909340797,2.205736758,0.3604557619  
H,0,-1.6288593808,2.688938843,-0.7950410258  
Zn,0,-6.4844076824,0.6757968508,-3.9533223042  
C,0,-10.4181310932,-1.7847728324,-7.4654401394  
H,0,-10.7965664537,-2.7627315236,-7.7626120026  
H,0,-11.0983325856,-0.940894791,-7.5776480996  
C,0,-9.2149339762,-1.6308310449,-6.9899458104  
C,0,-8.009117469,-1.4931496647,-6.4967290832  
H,0,-7.7968307323,-1.5760435179,-5.4311196558  
N,0,-6.8788184443,-1.2471257268,-7.2897223885  
C,0,-6.9276946717,-1.0256808756,-8.7219192485  
C,0,-5.7218960025,-0.7595093561,-6.780085856  
O,0,-5.4303937958,-0.6262447537,-5.5963520169  
O,0,-4.8739935563,-0.4482827498,-7.7626202776  
C,0,-5.4403152108,-0.8610194592,-9.0165499921  
H,0,-5.2153416245,-0.094153737,-9.7592607655  
H,0,-4.9671275921,-1.8083951509,-9.2992264351  
H,0,-7.3780102059,-1.8795891406,-9.2379277504  
H,0,-7.5188960818,-0.1239190168,-8.9408143257  
Zn,0,-3.0834636219,-0.35623507,-5.331377653  
C,0,-2.8143491241,1.4658858194,-6.00041933  
H,0,-3.7414738585,1.9339240068,-6.3462739157  
H,0,-2.0750247698,1.516455627,-6.8032973121  
C,0,-2.8892763459,-2.2492901,-4.8680606584  
H,0,-1.866736192,-2.5824975261,-4.6700109992  
H,0,-3.5326709985,-2.536552898,-4.0290000104  
C,0,-6.4361328482,2.3526634673,-4.9750685567  
H,0,-5.418729493,2.7507207798,-5.053338492  
H,0,-7.0773783405,3.1453595317,-4.5823434562  
C,0,-7.0240806513,-0.7533005624,-2.7158340279  
H,0,-8.0939072844,-0.9495488898,-2.6090150625  
H,0,-6.5204662894,-1.6947075438,-2.9623390695  
Cl,0,-3.4601634082,-3.2662098966,-6.2833697392  
Cl,0,-2.169503375,2.6284202823,-4.7195368617  
Cl,0,-6.4484226285,-0.3325407522,-1.0218130522  
Cl,0,-6.9959287867,2.1124165479,-6.7108352795  
H,0,0.145484798,-0.9436433633,-2.6794583688  
C,0,-0.4974894298,-0.0961283136,-2.937435914  
H,0,-1.399118692,-0.4838338612,-3.4215655916  
Zn,0,0.1551056375,1.66888276,-3.5610754972  
Cl,0,0.5464866388,0.0506881167,-5.2280814645  
C,0,0.8943049896,3.4601848667,-3.3183981253  
H,0,1.912206924,3.4978700748,-2.9244421966  
H,0,0.856319173,4.0461487418,-4.2397846873  
Cl,0,-0.119041568,4.4115351131,-2.112500347

-----  
Sum of electronic and thermal Free Energies=  
-4553.339507 (Hartree/Particle)

One imaginary frequency -351.26.

### D-PC2

C,0,4.8902979701,0.035646253,2.0368458299  
H,0,5.6301359837,0.7058791832,1.6009030949  
H,0,5.2134369927,-0.9706705103,2.3025526891



C,0,3.6498536077,0.434270491,2.269501391  
C,0,2.632586384,1.4748259125,2.0650560021  
H,0,2.5718865815,2.3075108257,2.772765248  
N,0,2.3050185646,1.8579826476,0.7233431316  
C,0,2.9364601485,3.0434547904,0.1632307603  
C,0,1.100825241,1.6565022283,0.1343450534  
O,0,0.2148959687,0.8762215979,0.4657040938  
O,0,0.9692354503,2.4451091846,-0.9408459709  
C,0,2.1926547977,3.1635095321,-1.1586866119  
H,0,2.7324332806,2.671648387,-1.9773897993  
H,0,1.9421037289,4.1888197264,-1.4371081417  
H,0,2.763763055,3.9050936729,0.8276253749  
H,0,4.0131441554,2.8895577122,0.0306921019  
Zn,0,-1.8565368111,1.8102257587,-0.2262201463  
C,0,-7.6376722685,0.6763520995,0.3604293719  
H,0,-8.3624748486,0.2846616493,1.0741995448  
H,0,-8.0215494766,1.3455325539,-0.4092632988  
C,0,-6.3734129521,0.3687763755,0.4290928817  
C,0,-5.1023914396,0.0657282206,0.5245213593  
H,0,-4.4026464381,0.6499902221,1.1212742842  
N,0,-4.5252580652,-1.0459212816,-0.1034852159  
C,0,-5.2395396706,-1.9395286825,-0.9924309066  
C,0,-3.1877090567,-1.1596871218,-0.2958320167  
O,0,-2.3126156446,-0.4352407488,0.1630468647  
O,0,-2.916477655,-2.2192057715,-1.0619841208  
C,0,-4.1329477434,-2.9423391383,-1.3042306588  
H,0,-4.1238810487,-3.2857865219,-2.3399258705  
H,0,-4.1509051385,-3.8019409171,-0.6242192538  
H,0,-6.1011853648,-2.3910578717,-0.4903840799  
H,0,-5.5895108131,-1.3890273279,-1.8785194436  
Zn,0,-0.1604557303,-1.5128407093,0.3360180457  
C,0,0.3477216003,-1.6000075843,-1.5647593523  
H,0,-0.3981688894,-1.1370873806,-2.2189648006  
H,0,0.5602385939,-2.6081677807,-1.9293287415  
C,0,-0.6064710505,-1.9780582696,2.1859172946  
H,0,0.149073627,-2.5662018914,2.7130164615  
H,0,-0.8491350273,-1.090899324,2.7807270248  
C,0,-1.8864026131,1.6408566551,-2.1826553909  
H,0,-1.0245662901,1.0718936306,-2.546234896  
H,0,-1.9056259511,2.5939781559,-2.7170896996  
C,0,-2.016913946,2.6045062894,1.5678799578  
H,0,-2.8856369733,3.2390266646,1.7601232143  
H,0,-1.966052096,1.837118417,2.3476170298  
Cl,0,-2.1258408901,-3.0096949814,2.2110774724  
Cl,0,1.8998515264,-0.6526682012,-1.9534958392  
Cl,0,-0.5662086275,3.6959981764,1.8844996803  
Cl,0,-3.366700058,0.7338679537,-2.7884423768  
H,0,1.9655289956,0.0869413268,3.6614966129  
C,0,2.2758189299,0.1072249344,2.6176988472  
H,0,1.7535982758,-0.6130745277,1.9884093101  
Zn,0,3.8110034924,-1.4367522304,-0.3919935661  
Cl,0,2.7251591472,-2.8755080892,0.7868504779  
C,0,5.3672584104,-0.7151327822,-1.3179685124  
H,0,6.2995126259,-0.8521246182,-0.7650924215  
H,0,5.4813258291,-1.15405274,-2.3123461973  
Cl,0,5.1981626132,1.0776337752,-1.5875171768

---

Sum of electronic and thermal Free Energies=  
-4553.440680 (Hartree/Particle)

No imaginary frequency.

### D-RC-B2

C,0,-4.6413421327,1.2923101382,0.7825465338  
H,0,-4.5035335211,0.504661843,0.0399794462  
H,0,-5.6536081504,1.4375364979,1.1544042452  
C,0,-3.6339819535,2.046205608,1.1849807543  
C,0,-2.2295342977,2.4179726638,1.0166519586  
H,0,-1.4613066302,1.8471391136,1.539378611  
N,0,-1.7361001265,2.9005500299,-0.2444400245  
C,0,-2.5593391887,3.567065225,-1.2402127722  
C,0,-0.7086852096,2.2710067012,-0.8553329242  
O,0,0.0387300216,1.4317901382,-0.3539867758  
O,0,-0.6109730775,2.6364410722,-2.1349391153  
C,0,-1.5550847599,3.6876168411,-2.3815316222  
H,0,-1.012244472,4.6397837207,-2.3545379069  
H,0,-1.9885255545,3.5344387451,-3.3712148662  
H,0,-3.4292446467,2.9438772701,-1.4967594118  
H,0,-2.9109841181,4.5437678416,-0.8924770587  
Zn,0,1.0089383736,-0.025219419,-1.7602231539  
C,0,3.5228798591,-5.1679192684,-1.4911947928  
H,0,3.6249121815,-6.1119657695,-0.9560124078  
H,0,3.8036629804,-5.1687910904,-2.5439613315  
C,0,3.080239329,-4.0916265969,-0.9050312914  
C,0,2.6183425482,-3.0266035629,-0.2966581515  
H,0,1.5551678003,-2.7910252453,-0.2389562509  
N,0,3.4437333091,-2.1190905885,0.3847779074  
C,0,4.8778592369,-2.2708321072,0.5300099456  
C,0,3.0850417277,-0.8321420488,0.6102407659  
O,0,1.9898798823,-0.3243306558,0.3867183365  
O,0,4.0991234319,-0.1505081843,1.1417015142  
C,0,5.1857239961,-1.054171808,1.3970837417  
H,0,6.1160087298,-0.5468315179,1.1365977797  
H,0,5.1745603859,-1.2926718066,2.467007401  
H,0,5.1249576867,-3.2212051497,1.0137708891  
H,0,5.3633508248,-2.2350041102,-0.4565529122  
Zn,0,1.6567306642,1.7091412344,1.4825233752  
C,0,2.7481800022,3.0014939621,0.488492557  
H,0,3.2934053894,2.5552089086,-0.3494408749  
H,0,3.4667212002,3.542240517,1.1093166643  
C,0,0.8189546148,0.9060155856,3.0693041732  
H,0,0.4939845572,1.6056584462,3.8443475031  
H,0,-0.0023217522,0.2166790468,2.8540693515  
C,0,2.5215575081,0.9059475516,-2.6022258774  
H,0,2.6523021508,1.930498094,-2.2402860847  
H,0,2.4707609549,0.9385576653,-3.693355818  
C,0,-0.4705053416,-1.3433480185,-1.8210887143  
H,0,-0.4339344431,-2.046391794,-2.6571513856  
H,0,-0.5620579562,-1.9177790454,-0.8916987615  
Cl,0,2.0996421442,-0.1362915322,3.8735206457  
Cl,0,1.6843493947,4.311771941,-0.2433486825  
Cl,0,-2.1124653332,-0.5037268431,-2.0233139024  
Cl,0,4.1073747982,0.0441976497,-2.2401636763  
H,0,-2.9728108452,3.2203539654,2.9573425585

C,0,-3.1620413668,3.2451677258,1.884970788  
H,0,-3.5058912744,4.2140164549,1.5211077213  
Zn,0,-3.1241063748,-1.8395515542,0.2367880288  
C,0,-1.7576961797,-1.1459913241,1.4391444768  
H,0,-1.1878290011,-0.326063106,0.9894387342  
H,0,-2.1371305879,-0.8263267939,2.4144046035  
Cl,0,-0.5399500336,-2.4706471859,1.7746721545  
C,0,-4.5462283724,-2.7632562951,-0.7218993305  
H,0,-5.1344991147,-3.4512041202,-0.1104872537  
H,0,-4.1666916088,-3.3060735609,-1.5916644011  
Cl,0,-5.723667259,-1.5343230953,-1.3779516335

-----  
Sum of electronic and thermal Free Energies=  
-4592.619360 (Hartree/Particle)  
No imaginary frequency.

### D-TS-B2

C,0,2.6884341077,3.0571080393,0.2126836923  
H,0,1.9443622083,3.1305090923,-0.5794193557  
H,0,3.263255912,3.957722809,0.4209335263  
C,0,2.98000601,1.8728269675,0.7622912985  
C,0,2.7177692964,0.4470448772,0.637161023  
H,0,1.9874627579,-0.0031704069,1.3129322514  
N,0,2.6647081938,-0.1551063685,-0.6644024157  
C,0,3.6990704642,-0.0705801596,-1.6764769549  
C,0,1.4441775587,-0.2467584904,-1.2507600115  
O,0,0.3623082835,-0.1280846479,-0.681447794  
O,0,1.5602918493,-0.4514922946,-2.5639413126  
C,0,2.9481220799,-0.6586719508,-2.8712236234  
H,0,3.112337799,-1.7378937964,-2.9640774509  
H,0,3.1657827249,-0.1654228334,-3.819870766  
H,0,4.0070469398,0.9746546214,-1.8421678037  
H,0,4.5789680577,-0.6640717054,-1.4078282926  
Zn,0,-1.6763920006,0.2168835047,-1.7427137321  
C,0,-7.4746527342,0.4956687639,-0.9721225401  
H,0,-8.2424991939,0.8589341931,-0.2891992031  
H,0,-7.7669862466,0.3646209983,-2.0135713458  
C,0,-6.2627584228,0.2412907995,-0.5673340855  
C,0,-5.0445330268,0.0072256428,-0.1462851973  
H,0,-4.2697225586,0.7719334732,-0.1300000322  
N,0,-4.6341525263,-1.2360039027,0.3574998486  
C,0,-5.4884450434,-2.4056977224,0.4227074331  
C,0,-3.3331826973,-1.602341697,0.4420341277  
O,0,-2.3516150591,-0.8929811614,0.2398695389  
O,0,-3.2324640476,-2.8799734383,0.8122033079  
C,0,-4.5437700414,-3.3839738609,1.1113453647  
H,0,-4.6090402103,-4.4058049882,0.7343612385  
H,0,-4.6631122147,-3.378671272,2.2010619625  
H,0,-6.3954400648,-2.1993914346,0.9995860698  
H,0,-5.7735147076,-2.7199230409,-0.5926662601  
Zn,0,-0.3758779516,-1.7049523061,1.1045600099  
C,0,-0.1060544373,-3.3156066958,0.0189035188  
H,0,-0.8042249517,-3.3695080474,-0.8227459831  
H,0,-0.1924758852,-4.2461933464,0.585759893  
C,0,-0.518127801,-0.4883299015,2.6355087804  
H,0,0.3034888733,-0.4290270397,3.3549426513

H,0,-0.8037428491,0.5285011692,2.3419129536  
C,0,-1.7536224767,-1.356158574,-2.9144576241  
H,0,-0.9518172438,-2.0718709853,-2.7026943515  
H,0,-1.7424859695,-1.1415438786,-3.9855648637  
C,0,-1.9447573784,2.0169274456,-0.9970812298  
H,0,-2.8572198275,2.5414601459,-1.2945510306  
H,0,-1.9002434636,2.001941014,0.1000739392  
Cl,0,-1.9551719961,-1.1186006867,3.5963859666  
Cl,0,1.5700182633,-3.3732723991,-0.7321797623  
Cl,0,-0.5921746328,3.1640352504,-1.5051561956  
Cl,0,-3.3211949643,-2.2832547105,-2.6395936846  
H,0,4.0392430688,0.7556718643,2.3947386235  
C,0,3.9737660536,0.9561039553,1.326175838  
H,0,4.9352451465,0.9195739476,0.8112085768  
Zn,0,-0.0229960325,4.5915714439,0.9300687333  
C,0,0.8904820113,2.9656196073,1.609993537  
H,0,0.5510603841,2.0119037709,1.1949585788  
H,0,1.3439168511,2.8469619843,2.5983918512  
Cl,0,-1.3899188028,3.3969468208,2.4405754245  
C,0,0.013452685,6.340474621,0.0823656715  
H,0,0.0989898443,7.1948312408,0.7567054172  
H,0,-0.8246132651,6.5091564651,-0.5975216413  
Cl,0,1.5186797004,6.3787658645,-0.9678409543

-----  
Sum of electronic and thermal Free Energies=  
-4592.579928 (Hartree/Particle)  
One imaginary frequency -349.11.

### D-PC-B2

C,0,-3.5489843433,0.6429916133,0.998219397  
H,0,-2.8864471767,0.1497009807,0.2821623935  
H,0,-4.6135588306,0.5671003461,0.78327423  
C,0,-3.0249409129,1.9049063129,1.553068874  
C,0,-2.0480863364,2.8790585118,1.0283784293  
H,0,-1.1935328766,3.1900226981,1.6354987495  
N,0,-1.8010363889,2.8456428206,-0.3831668327  
C,0,-1.9807578642,3.9813265716,-1.2704539954  
C,0,-0.9161500787,1.9786658552,-0.9193209084  
O,0,-0.3575638388,1.0343749712,-0.3588366088  
O,0,-0.7076020567,2.250830749,-2.2118991398  
C,0,-1.5170623098,3.3748869959,-2.5931107622  
H,0,-0.9012748573,4.0477244508,-3.1932934235  
H,0,-2.3516861506,3.0009315385,-3.1962703968  
H,0,-3.0257168115,4.305829335,-1.3008840057  
H,0,-1.3546818607,4.8252273577,-0.9470266405  
Zn,0,0.8969570438,-0.3370735142,-1.76243869  
C,0,4.5421566567,-4.9306112796,-1.8134360565  
H,0,4.7296824638,-5.8841678758,-1.3198932895  
H,0,4.9237618054,-4.8203051567,-2.8281072295  
C,0,3.8842972674,-3.9724321401,-1.2245606296  
C,0,3.204465389,-3.0273945099,-0.623703264  
H,0,2.1202016915,-2.9522852152,-0.6879122639  
N,0,3.8018063536,-2.0446088638,0.1784652439  
C,0,5.232382324,-1.9342448026,0.3866861773  
C,0,3.193172153,-0.8714636507,0.4795896699  
O,0,2.0233741273,-0.5696794459,0.2624852985

O,0,4.0457168217,-0.0498182502,1.092681903  
C,0,5.2666493921,-0.7574990068,1.3548245629  
H,0,6.0994034501,-0.0711543406,1.1947102961  
H,0,5.2430053013,-1.0823935507,2.4018272879  
H,0,5.6401672166,-2.8568266075,0.8118189688  
H,0,5.7351538231,-1.7275133405,-0.569897182  
Zn,0,1.2046303393,1.231745083,1.5101961132  
C,0,2.2561273077,2.7088403059,0.74525878  
H,0,2.879359198,2.3713412414,-0.0896110306  
H,0,2.9100664544,3.1978160493,1.4721092387  
C,0,0.4459061006,0.0009986262,2.8314022469  
H,0,-0.1246205497,0.4331738486,3.657377261  
H,0,-0.1504284794,-0.7873590984,2.3552387476  
C,0,2.1991795084,0.8643218772,-2.6126351529  
H,0,2.1839952176,1.8740911597,-2.1907870651  
H,0,2.0878072102,0.9520805948,-3.6963280053  
C,0,-0.2911599995,-1.8971376428,-1.5548228046  
H,0,-0.095775983,-2.7699935808,-2.1836052079  
H,0,-0.3289275512,-2.2154932101,-0.5055532229  
Cl,0,1.8511503704,-0.8755119234,3.6339458797  
Cl,0,1.2360837943,4.0743007254,0.0528384749  
Cl,0,-2.0449145825,-1.4565557556,-1.9493465037  
Cl,0,3.9209011535,0.2608859116,-2.3674704379  
H,0,-3.4721161027,3.9127405526,2.3888421216  
C,0,-3.4280652937,3.3181009111,1.479139562  
H,0,-4.1444676153,3.6045081704,0.7099806143  
Zn,0,-3.4414605561,-2.2183463467,0.0996036851  
C,0,-3.0751409628,0.7272701867,2.4351946515  
H,0,-2.1470137652,0.2142156402,2.6793310273  
H,0,-3.8306779129,0.7064195051,3.2173076712  
Cl,0,-1.9106140836,-2.7894203452,1.4910762636  
C,0,-5.2666493395,-2.1135415741,-0.5762499108  
H,0,-5.9958291324,-1.9364857075,0.2181460876  
H,0,-5.5520128008,-3.024698051,-1.1075026586  
Cl,0,-5.4572005308,-0.752733711,-1.762773589

-----  
Sum of electronic and thermal Free Energies=  
-4592.695923 (Hartree/Particle)  
No imaginary frequency.

#### D-RC-O

C,0,-4.8929548203,2.2215743416,-0.3673680671  
H,0,-5.5076749845,2.6598654974,-1.153529971  
H,0,-5.4047828972,2.0092862432,0.573487519  
C,0,-3.622819422,1.9711820096,-0.5391283653  
C,0,-2.3490459384,1.7390853245,-0.7490769544  
H,0,-1.9827220856,0.8062447982,-1.177465522  
N,0,-1.3408960398,2.6587579142,-0.439281555  
C,0,-1.5883564402,3.8960324131,0.2756833391  
C,0,-0.0403762521,2.2802972942,-0.2817506397  
O,0,0.4654836162,1.2147813983,-0.5991509015  
O,0,0.6607502265,3.2761632784,0.2672361286  
C,0,-0.1685994075,4.4430880703,0.3579922737  
H,0,0.0591327725,4.9527564739,1.2953102429  
H,0,0.0746474323,5.0928936663,-0.4909821835  
H,0,-2.2705251199,4.5473030078,-0.2795896505

H,0,-2.0261621552,3.6743227427,1.2609916782  
Zn,0,2.8755146645,1.4340339298,-0.4463514289  
C,0,7.7704287981,-1.600632243,-1.404480213  
H,0,8.2082037278,-2.2766389464,-2.1390005877  
H,0,8.4652030654,-1.0245547656,-0.7938867096  
C,0,6.4802803293,-1.4781451783,-1.2693345778  
C,0,5.1810828498,-1.351624807,-1.1580605254  
H,0,4.6088876627,-0.6272159338,-1.7371640099  
N,0,4.4021562301,-2.1404921493,-0.2995867218  
C,0,4.9535226849,-3.0908431817,0.646435722  
C,0,3.143766884,-1.7906825021,0.0671363482  
O,0,2.4593906586,-0.8932725681,-0.4117534007  
O,0,2.7032824091,-2.5906101289,1.0392468884  
C,0,3.6658532606,-3.6325535858,1.2582064825  
H,0,3.7273906433,-3.8183253133,2.3315296792  
H,0,3.3067877887,-4.530448886,0.74186968  
H,0,5.5456250932,-3.8574485971,0.1366477357  
H,0,5.5936331949,-2.5661130006,1.3712828587  
Zn,0,0.1690596638,-1.073070479,0.1763170806  
C,0,0.2247763523,-0.5915339771,2.0829674758  
H,0,1.2448579933,-0.3720994199,2.4174829403  
H,0,-0.1909370942,-1.3602578274,2.7398176154  
C,0,-0.2102740351,-1.9363396436,-1.5449610621  
H,0,-1.2523402571,-2.1918933099,-1.758826117  
H,0,0.1859180864,-1.3479854958,-2.3797456977  
C,0,3.1800520247,1.5968232983,1.4857930727  
H,0,2.2523921678,1.4895013239,2.058849455  
H,0,3.6522162369,2.5366139867,1.7831476764  
C,0,2.9798563158,1.7150343497,-2.3854721594  
H,0,3.9766899561,1.8436515447,-2.8159671555  
H,0,2.4710982122,0.9052684555,-2.9198953474  
Cl,0,0.6803819216,-3.5399572458,-1.6081975191  
Cl,0,-0.7428965407,0.9275912019,2.4831385152  
Cl,0,2.0665923916,3.2428018574,-2.8350673764  
Cl,0,4.304840217,0.2877795682,2.1220074154  
H,0,-2.8599529681,-1.2919297149,-0.5521076884  
C,0,-3.1810768828,-1.2641818395,0.493706984  
H,0,-2.5391076634,-0.5690771052,1.0457287085  
Zn,0,-5.0512288238,-0.8145185787,0.6969663284  
Cl,0,-2.8773288784,-2.922371079,1.1697456915  
C,0,-6.9490501213,-0.4858518785,0.9532586977  
H,0,-7.503838237,-1.3848835691,1.2326851063  
H,0,-7.1730128989,0.2919867279,1.6885683576  
Cl,0,-7.6461225685,0.0791672327,-0.6312415889

-----  
Sum of electronic and thermal Free Energies=  
-4553.361343 (Hartree/Particle)  
No imaginary frequency.

#### D-TS-O

C,0,4.6233421153,1.4275015566,-0.4038044778  
H,0,5.4276835958,1.5737391699,0.3183643808  
H,0,4.9298934074,1.3940032635,-1.4498189896  
C,0,3.3522578718,1.4476559972,-0.0527486346  
C,0,2.0978212176,1.386713868,0.3215498083  
H,0,1.6205512855,0.4353193884,0.5664140601

N,0,1.2503520824,2.4851289152,0.4478229943  
C,0,1.5856991678,3.8382923655,0.051390394  
C,0,-0.1046375295,2.322213188,0.4845681323  
O,0,-0.6985162136,1.2599853214,0.5909969749  
O,0,-0.7129407016,3.501414946,0.4052660125  
C,0,0.2715034054,4.5470228328,0.3786634829  
H,0,-0.0326732916,5.2769684743,-0.3733790469  
H,0,0.287968586,5.0165953743,1.3681385086  
H,0,2.4334538714,4.2229974543,0.6276593501  
H,0,1.8388504588,3.8651289571,-1.0188273458  
Zn,0,-2.950434874,1.291626964,1.2075141302  
C,0,-7.4694921916,-1.9940732605,2.2706257633  
H,0,-7.7858452211,-2.8878003777,2.8082311272  
H,0,-8.2320804569,-1.2385383818,2.0835814064  
C,0,-6.2379990756,-1.8289728164,1.8785641155  
C,0,-4.9911956699,-1.6686838641,1.5088483355  
H,0,-4.2461225206,-1.1989454869,2.150228275  
N,0,-4.494990437,-2.1049414033,0.2710989594  
C,0,-5.3160421498,-2.7206850177,-0.7524658322  
C,0,-3.355783697,-1.611677715,-0.2744268722  
O,0,-2.5353572931,-0.8793720513,0.2686949487  
O,0,-3.2088092436,-2.0524509051,-1.524293157  
C,0,-4.2585070441,-2.9869080282,-1.8191885195  
H,0,-4.6010614236,-2.802121806,-2.838560003  
H,0,-3.8383534128,-3.9964135061,-1.7443712736  
H,0,-5.7924865114,-3.6328268696,-0.378963705  
H,0,-6.098207594,-2.0188648691,-1.0781293332  
Zn,0,-0.5272507079,-0.6519436002,-0.9267196189  
C,0,-1.0779017804,0.4014771174,-2.4898389608  
H,0,-2.1216473658,0.72941985,-2.4279609358  
H,0,-0.9378759644,-0.1060412139,-3.4472913743  
C,0,0.3937010109,-1.9436556133,0.2306679667  
H,0,1.4468309514,-2.1658057652,0.0289535598  
H,0,0.2904190692,-1.6765023147,1.2890329425  
C,0,-3.7706113724,2.0897113276,-0.388787254  
H,0,-3.016215687,2.3599957034,-1.1361974866  
H,0,-4.3730598167,2.9781905938,-0.1842469716  
C,0,-2.5010348359,0.928936277,3.0835554447  
H,0,-3.3264943723,0.856898909,3.7964145811  
H,0,-1.8772608584,0.0334675615,3.1799586305  
Cl,0,-0.4721597311,-3.5493722461,0.0500558631  
Cl,0,-0.0898134561,1.9501786848,-2.638410922  
Cl,0,-1.4607945308,2.3143509361,3.6960530637  
Cl,0,-4.9184104599,0.9370211415,-1.2455812446  
H,0,3.8910284061,-0.8259580082,0.8463959726  
C,0,4.3033340867,-0.8410053204,-0.165554147  
H,0,3.5199708318,-0.9235573081,-0.9234879993  
Zn,0,6.1258914709,-1.5387594113,-0.4822713579  
Cl,0,4.6275274652,-3.2680164464,-0.0918549339  
C,0,8.0121082191,-1.2705576733,-0.8375818221  
H,0,8.6707059407,-1.6702800591,-0.0636881608  
H,0,8.3439800824,-1.6557341169,-1.8039267541  
Cl,0,8.3099358917,0.5347381865,-0.8790700508

-----  
Sum of electronic and thermal Free Energies=  
-4553.326141 (Hartree/Particle)  
One imaginary frequency -328.66.

## D-PC-O

C,0,-4.6666735843,0.4460153557,-0.1537616731  
H,0,-5.2095031298,1.2005982187,-0.7315710993  
H,0,-4.7551745824,0.5468341771,0.9301560959  
C,0,-3.3846488872,-0.0186025653,-0.6887874726  
C,0,-2.1110625617,0.2534289936,-0.9125181558  
H,0,-1.4235145693,-0.458320208,-1.3660774767  
N,0,-1.5250628541,1.4885514386,-0.6106179764  
C,0,-2.2327017594,2.6307530928,-0.0608769827  
C,0,-0.191481366,1.6169745502,-0.3874150161  
O,0,0.6633139674,0.7535851639,-0.5498089975  
O,0,0.0979808147,2.8462204797,0.0360987771  
C,0,-1.0944458188,3.6451961507,0.0021111874  
H,0,-1.1098677062,4.2704368764,0.8963241038  
H,0,-1.0501353419,4.2758808718,-0.8933532772  
H,0,-3.0521868952,2.9460487284,-0.7144736058  
H,0,-2.6451667382,2.3860484144,0.9288701997  
Zn,0,2.8984310147,1.4455684452,-0.6020105196  
C,0,8.2405538056,-0.7834684799,-1.373583356  
H,0,8.7741936841,-1.4720160251,-2.0286892454  
H,0,8.8341345841,-0.0066688005,-0.8921876892  
C,0,6.9549012148,-0.8761601805,-1.1830604614  
C,0,5.6589585071,-0.9687966274,-1.0149888865  
H,0,4.9445373188,-0.4517895907,-1.655113573  
N,0,5.067950529,-1.747398868,-0.0093039782  
C,0,5.8154699114,-2.434832055,1.024543312  
C,0,3.7782997339,-1.5821930163,0.3768631668  
O,0,2.9248169551,-0.9017430034,-0.1802036791  
O,0,3.5253168202,-2.3001196703,1.4728264556  
C,0,4.6707334081,-3.1128042193,1.76945652  
H,0,4.7982970568,-3.1395274655,2.852670203  
H,0,4.4688290384,-4.1213164324,1.3890640267  
H,0,6.5299013862,-3.1424136184,0.5918205804  
H,0,6.3627900502,-1.7045521935,1.6393779835  
Zn,0,0.7335909076,-1.3825107816,0.4846783079  
C,0,0.6644333609,-0.6959572168,2.3246523305  
H,0,1.5964112566,-0.1947235534,2.6073309868  
H,0,0.4497645173,-1.4550184481,3.0809526882  
C,0,0.4870770978,-2.5667536724,-1.0632185559  
H,0,-0.4880781914,-3.047134464,-1.1809143202  
H,0,0.7382116763,-2.0539913401,-1.9988106679  
C,0,3.2388912821,1.972703039,1.2596431138  
H,0,2.3628552536,1.8177473708,1.898673578  
H,0,3.5639232735,3.0089804399,1.3807057931  
C,0,2.889441794,1.4345084618,-2.5652869476  
H,0,3.8126152074,1.7144556803,-3.07953141  
H,0,2.5552803309,0.464354168,-2.9499878175  
Cl,0,1.6877884091,-3.9534798018,-0.9399986408  
Cl,0,-0.6540306368,0.5693530226,2.5486280529  
Cl,0,1.6342494756,2.643540852,-3.1469940216  
Cl,0,4.582960275,0.9745090376,2.0250949968  
H,0,-4.982287096,-1.1386432565,-1.7089092046  
C,0,-4.4957562448,-0.9497180461,-0.7522652463  
H,0,-4.5153154253,-1.7974504763,-0.0682747649  
Zn,0,-7.5719230845,0.6380299696,0.2465295681  
Cl,0,-8.1355026037,-0.9273192236,-1.0346898193  
C,0,-7.2872351043,2.1357541006,1.4347085748  
H,0,-8.2337177699,2.5796506709,1.7505722025

H,0,-6.716930036,1.8587590638,2.3246224958  
Cl,0,-6.3564129311,3.439509466,0.5887032371

-----  
Sum of electronic and thermal Free Energies=  
-4553.428116 (Hartree/Particle)  
No imaginary frequency.

### D-RC-B3

C,0,5.3863909996,1.3905598118,1.5954815068  
H,0,5.651424933,2.3629511738,2.010198577  
H,0,5.9216703459,1.1325630946,0.6801545016  
C,0,4.0167521499,0.9083229094,1.7584959867  
C,0,2.7272026426,1.0066014552,1.4616389538  
H,0,1.9661870498,0.3795189778,1.9263067311  
N,0,2.2127733656,1.9097936743,0.5333889259  
C,0,2.9596953211,2.9754883742,-0.1136895728  
C,0,0.9251054052,1.8850141798,0.1043959719  
O,0,0.0128407006,1.1853151036,0.5287994033  
O,0,0.7488871915,2.7738462396,-0.87560497  
C,0,2.029380517,3.2911879253,-1.2794818977  
H,0,2.3306542654,2.758084716,-2.1893448563  
H,0,1.914974914,4.3562385734,-1.4857412748  
H,0,3.0937654254,3.8166771924,0.5797476999  
H,0,3.935877036,2.6146912191,-0.4516799942  
Zn,0,-2.0909194299,1.9947189924,-0.2811867856  
C,0,-7.7962155715,0.9634699186,-0.0422538711  
H,0,-8.5930138742,0.7247663993,0.6620803852  
H,0,-8.0887658874,1.4753306181,-0.9586848117  
C,0,-6.5524162615,0.6614737543,0.2013539678  
C,0,-5.3036773341,0.3678995558,0.4671968477  
H,0,-4.6398857142,1.0485767523,0.9995842504  
N,0,-4.7093599588,-0.8514135639,0.1100580982  
C,0,-5.3752160637,-1.8773050876,-0.6684793876  
C,0,-3.3653774255,-1.0164273446,0.048462408  
O,0,-2.5072733936,-0.2314108054,0.4387635602  
O,0,-3.064155286,-2.1988782061,-0.4890856781  
C,0,-4.277231417,-2.9353458944,-0.7088672685  
H,0,-4.1920601832,-3.4518794029,-1.6661586415  
H,0,-4.3758800733,-3.6654369151,0.1025826864  
H,0,-6.2876831581,-2.2208976565,-0.1708577139  
H,0,-5.6374213423,-1.4820627077,-1.6613823462  
Zn,0,-0.3957079805,-1.1818368594,0.6676931738  
C,0,0.0994883371,-1.545633008,-1.2005158827  
H,0,-0.6456193954,-1.1935267303,-1.9210471334  
H,0,0.3116442916,-2.5996367158,-1.3962896398  
C,0,-0.6360495766,-1.4132470633,2.6013187912  
H,0,0.1819549126,-1.8776327566,3.1594065261  
H,0,-0.9027927259,-0.4704111362,3.0907559207  
C,0,-1.9812864458,1.546372196,-2.1902337822  
H,0,-1.0659297442,0.9927491841,-2.4256437033  
H,0,-2.0315776584,2.4106053297,-2.8573030852  
C,0,-2.44287956,2.9298060181,1.4081822865  
H,0,-3.3770388838,3.4944644813,1.4727115463  
H,0,-2.3992366569,2.2341257045,2.2535233837  
Cl,0,-2.0733524098,-2.5256587152,2.8627376542  
Cl,0,1.6540014313,-0.6715290029,-1.7094794511

Cl,0,-1.119902958,4.1599033843,1.7271992897  
Cl,0,-3.3582656402,0.4543800635,-2.7330353363  
H,0,5.0860641664,0.4925794898,3.6365317222  
C,0,5.0476323701,0.2712161024,2.5708366711  
H,0,5.3741573331,-0.738557744,2.3152499255  
H,0,3.4945963247,-2.8392443202,2.0580230559  
C,0,2.7944383468,-2.4875516186,1.2942639037  
H,0,1.9841528401,-1.9591681776,1.8087447735  
Zn,0,3.6658515825,-1.4441886686,-0.1131112547  
Cl,0,2.0380217211,-3.9878445941,0.5846467505  
C,0,5.1019689932,-0.8686035236,-1.3228288086  
H,0,6.0831243615,-0.7943205571,-0.8433881356  
H,0,5.2009497747,-1.5541445355,-2.1692012098  
Cl,0,4.8073649606,0.7702717464,-2.0790883437

-----  
Sum of electronic and thermal Free Energies=  
-4592.635219 (Hartree/Particle)  
No imaginary frequency.

### D-TS-B3

C,0,-0.0552918884,0.1556967093,0.4896664575  
H,0,0.1011808056,0.4481766994,1.5273628563  
H,0,0.841955823,-0.2019359493,-0.0165411947  
C,0,-1.0434589663,0.8807990641,-0.3058630609  
C,0,-1.481736401,2.0752487026,-0.733875691  
H,0,-2.452726487,2.2142626871,-1.2091270996  
N,0,-0.7284009898,3.229640807,-0.6246401215  
C,0,0.2621639167,3.5101352724,0.4045090058  
C,0,-0.9486764253,4.3205511452,-1.4187254883  
O,0,-1.7213299092,4.3724070082,-2.3626089501  
O,0,-0.1981782002,5.3405133124,-1.0121314866  
C,0,0.77947824,4.8691387374,-0.0672795899  
H,0,1.7349956346,4.771274591,-0.5963595057  
H,0,0.8656811453,5.6102550709,0.7286353888  
H,0,-0.2236862267,3.5437939506,1.3884302049  
H,0,1.0597557086,2.7596668518,0.4089938203  
Zn,0,-2.5353798829,6.5136397574,-2.8498568093  
C,0,-6.1174025396,9.4264565878,-6.3087728335  
H,0,-7.1003224168,9.352979459,-6.7739049326  
H,0,-5.7298744397,10.430444317,-6.1378125266  
C,0,-5.440862475,8.367944226,-5.96307288  
C,0,-4.7807195324,7.2950084816,-5.6030879664  
H,0,-4.8919756114,6.8394818735,-4.6196873732  
N,0,-3.8865724614,6.6228614931,-6.4492061711  
C,0,-3.5271146109,7.0888563934,-7.7733817809  
C,0,-2.9464449474,5.7650572476,-5.9815500689  
O,0,-2.8461368186,5.3266022154,-4.8413066034  
O,0,-2.1126907015,5.4087625969,-6.9609810483  
C,0,-2.5719831674,5.9773328022,-8.1975856455  
H,0,-1.7014049004,6.3289920013,-8.7534615817  
H,0,-3.0812361117,5.1865917317,-8.7601119373  
H,0,-4.4099042636,7.1685021278,-8.4157840278  
H,0,-3.0464696436,8.0761941644,-7.7041749036  
Zn,0,-1.4637020602,3.3729569697,-4.764644405  
C,0,0.3092289887,4.1749515993,-4.9995529536  
H,0,0.2769919142,5.2627693998,-5.1150453276

H,0,0.8624915482,3.7474740185,-5.839136898  
C,0,-3.0638649583,2.244894331,-4.7562656132  
H,0,-2.8755065135,1.1679554979,-4.7543195361  
H,0,-3.7320502547,2.4972234464,-3.9247208763  
C,0,-0.9398819303,7.4930666427,-3.44987795  
H,0,-0.0672919968,6.8354265763,-3.5306112078  
H,0,-0.6626017773,8.3412893696,-2.819301473  
C,0,-4.2073713635,6.0452314266,-1.9243832251  
H,0,-4.9498262903,6.8355716019,-1.7871709045  
H,0,-4.6932581241,5.1911838909,-2.4096676784  
Cl,0,-4.0417292275,2.559560903,-6.2750349991  
Cl,0,1.4242339928,3.907935499,-3.5489978667  
Cl,0,-3.8140884956,5.4671628495,-0.2240733727  
Cl,0,-1.1622363347,8.2107080487,-5.129553118  
H,0,-2.1381463226,-0.6011994472,0.8844361208  
C,0,-1.3861567148,-0.4765010458,0.1072381866  
H,0,-1.3721197026,-1.2763801534,-0.6319881087  
H,0,-0.8623243271,-0.1149730085,-2.5395289628  
C,0,-0.4260148559,0.8886641656,-2.5456426597  
H,0,-1.152212382,1.574413088,-2.9935018021  
Zn,0,1.4996434699,1.2521833167,-2.8397969961  
Cl,0,0.5210683699,0.5051802116,-4.851545643  
C,0,3.3535748565,1.3201110785,-2.2273601686  
H,0,3.8159384246,0.3531009129,-2.0173662362  
H,0,4.0022267592,1.8733112361,-2.9105072327  
Cl,0,3.4434568526,2.246274506,-0.6374758509

-----  
Sum of electronic and thermal Free Energies=  
-4592.602192 (Hartree/Particle)

One imaginary frequency -290.03.

### D-PC-B3

C,0,4.8630774648,0.1991938944,1.6363806862  
H,0,5.2519566821,0.799124218,0.813287062  
H,0,5.0167176787,-0.8756750225,1.5336900729  
C,0,3.6478958315,0.6587663357,2.3403868646  
C,0,2.5031250617,1.526652083,1.9902922769  
H,0,2.2587471601,2.3709695141,2.6412721982  
N,0,2.2525287983,1.8014851657,0.6044120753  
C,0,2.8956048765,2.9607387503,0.0009353154  
C,0,1.0520334581,1.5891717043,0.0081076761  
O,0,0.1580742606,0.8268230409,0.3618733876  
O,0,0.9304307584,2.3336620667,-1.0972158894  
C,0,2.1473894417,3.0597536212,-1.3224585108  
H,0,2.6873520237,2.5629141365,-2.137474206  
H,0,1.8877146822,4.0807026568,-1.6092676094  
H,0,2.7447992151,3.8444783456,0.640350591  
H,0,3.9692286309,2.7924859564,-0.1378486401  
Zn,0,-1.9025403682,1.7608093024,-0.3385219321

C,0,-7.629378575,1.0172415024,0.4682434383  
H,0,-8.3456205308,0.7521464207,1.245917596  
H,0,-8.0040228769,1.623309546,-0.3562511348  
C,0,-6.3838381213,0.6388949101,0.5246555536  
C,0,-5.1294871766,0.2693320263,0.6057706023  
H,0,-4.3706093511,0.8697097598,1.1068539716  
N,0,-4.6446001684,-0.9355474002,0.0779162523  
C,0,-5.4412909383,-1.8541750641,-0.7093292276  
C,0,-3.3235927184,-1.1490438387,-0.1460003276  
O,0,-2.3931110076,-0.4409448038,0.2191830914  
O,0,-3.1433941561,-2.2881546569,-0.8178679477  
C,0,-4.4095726505,-2.9495537251,-0.9603499261  
H,0,-4.4573786073,-3.3822796156,-1.9609536404  
H,0,-4.4583778993,-3.7428040813,-0.2054518112  
H,0,-6.3134428317,-2.2030759547,-0.1471899019  
H,0,-5.7838743675,-1.3579225754,-1.629784415  
Zn,0,-0.251386613,-1.5305781335,0.2981851248  
C,0,0.0630786577,-1.6754442832,-1.6474135295  
H,0,-0.7340800705,-1.2121317311,-2.2388176891  
H,0,0.2229654617,-2.6933918774,-2.0120050973  
C,0,-0.5401567913,-1.9273553083,2.1943570815  
H,0,0.2622209583,-2.4898631484,2.6786848849  
H,0,-0.7254099805,-1.009234063,2.7627520802  
C,0,-1.9853449842,1.5001176626,-2.2850627651  
H,0,-1.116529811,0.9467924969,-2.6586571213  
H,0,-2.0571432038,2.4295447668,-2.8555889547  
C,0,-2.0222070526,2.653466438,1.412889948  
H,0,-2.8913308371,3.2902933597,1.5966261289  
H,0,-1.9386780026,1.9302737257,2.2313859981  
Cl,0,-2.0500625962,-2.9473057036,2.4228104866  
Cl,0,1.5819855388,-0.7623342289,-2.2323839784  
Cl,0,-0.5754585716,3.7754570738,1.6235588828  
Cl,0,-3.4540708865,0.5197797184,-2.8016066948  
H,0,5.3788514492,1.7614719337,3.1553570753  
C,0,4.9372297509,0.773665441,3.040248563  
H,0,5.1452796437,0.0846137338,3.8557257844  
H,0,1.8738925776,0.0854359962,3.5507675075  
C,0,2.2842967129,0.1415447045,2.5447886364  
H,0,1.926674581,-0.6289617078,1.8648774119  
Zn,0,3.5765025491,-1.5579386965,-0.914868378  
Cl,0,2.6374853204,-2.878067474,0.502184951  
C,0,5.1421224293,-0.8401902722,-1.8313594119  
H,0,6.0577078024,-0.9498798559,-1.2453753842  
H,0,5.2918048441,-1.3185596242,-2.802320807  
Cl,0,4.9786524444,0.939496838,-2.1791733256

-----  
Sum of electronic and thermal Free Energies=  
-4592.699197 (Hartree/Particle)

No imaginary frequency.

## 5. References

### Complete List of Authors for References with more than 10 Authors

(68) Gaussian 09, Revision A.01, M. J. Frisch, G. W. Trucks, H. B. Schlegel, G. E. Scuseria, M. A. Robb, J. R. Cheeseman, G. Scalmani, V. Barone, B. Mennucci, G. A. Petersson, H. Nakatsuji, M. Caricato, X. Li, H. P. Hratchian, A. F. Izmaylov, J. Bloino, G. Zheng, J. L. Sonnenberg, M. Hada, M. Ehara, K. Toyota, R. Fukuda, J. Hasegawa, M. Ishida, T. Nakajima, Y. Honda, O. Kitao, H. Nakai, T. Vreven, J. A. Montgomery, Jr., J. E. Peralta, F. Ogliaro, M. Bearpark, J. J. Heyd, E. Brothers, K. N. Kudin, V. N. Staroverov, R. Kobayashi, J. Normand, K. Raghavachari, A. Rendell, J. C. Burant, S. S. Iyengar, J. Tomasi, M. Cossi, N. Rega, J. M. Millam, M. Klene, J. E. Knox, J. B. Cross, . Bakken, C. Adamo, J. Jaramillo, R. Gomperts, R. E. Stratmann, O. Yazyev, A. J. Austin, R. Cammi, C. Pomelli, J. W. Ochterski, R. L. Martin, K. Morokuma, V. G. Zakrzewski, G. A. Voth, P. Salvador, J. J. Dannenberg, S. Dapprich, A. D. Daniels, O. Farkas, J. B. Foresman, J. V. Ortiz, J. Cioslowski, and D. J. Fox, Gaussian, Inc., Wallingford CT, 2009.

## 6. Comparison of different polarized continuum models

**Table S1.** Free energies and enthalpies of mono-cyclopropanation of **1** from **SM1** (kcal/mol)

| $\Delta G_{\text{DCE}}$<br>( $\Delta H_{\text{DCE}}$ ) | <b>SM1</b> | <b>M-RC-T</b> | <b>M-TS-T1</b> | <b>M-TS-T2</b> | <b>M-TS-T3</b> | <b>M-PC-T</b> |
|--------------------------------------------------------|------------|---------------|----------------|----------------|----------------|---------------|
| IEFPCM                                                 | 0.0 (0.0)  | 3.3 (-8.7)    | 27.3 (14.2)    | 26.1 (12.1)    | 26.2 (13.8)    | -46.6 (-59.6) |
| CPCM                                                   | 0.0 (0.0)  | 3.7 (-8.3)    | 27.5 (14.4)    | 26.0 (12.0)    | 26.0 (13.6)    | -47.1 (-60.0) |

**Table S2.** Free energies and enthalpies of mono-cyclopropanation of **1** from **SM2** (kcal/mol)

| $\Delta G_{\text{DCE}}$<br>( $\Delta H_{\text{DCE}}$ ) | <b>SM2</b> | <b>D-RC1</b> | <b>D-TS1</b> | <b>D-TS2</b> | <b>D-PC1</b>  |
|--------------------------------------------------------|------------|--------------|--------------|--------------|---------------|
| IEFPCM                                                 | 0.0 (0.0)  | 7.2 (-31.9)  | 34.2 (-7.3)  | 29.5 (-10.4) | -45.6 (-84.4) |
| CPCM                                                   | 0.0 (0.0)  | 7.8 (-31.3)  | 34.6 (-7.0)  | 29.9 (-10.0) | -46.0 (-84.8) |

As showed in Tables S1 and S2, the relative free energies and enthalpies with CPCM are similar to those with IEFPCM.

## 7. Explicit solvent effects

**Table S3.** Explicit solvent effects on mono-cyclopropanation of **1** in monomeric form (kcal/mol)

| $\Delta G_{\text{DCE}}$<br>( $\Delta H_{\text{DCE}}$ ) | SM1       | M-RC-T      | M-TS-T1     | M-TS-T2     | M-PC-T        |
|--------------------------------------------------------|-----------|-------------|-------------|-------------|---------------|
| IEFPCM                                                 | 0.0 (0.0) | 3.3 (-8.7)  | 27.3 (14.2) | 26.1 (12.1) | -46.6 (-59.6) |
| Explicit<br>Solvent                                    | 0.0 (0.0) | 9.7 (-12.8) | 36.6 (10.2) | 33.0 (8.0)  | -37.6 (-62.9) |

**Table S4.** Explicit solvent effects on mono-cyclopropanation of **1** in dimeric form (kcal/mol)

| $\Delta G_{\text{DCE}}$<br>( $\Delta H_{\text{DCE}}$ ) | SM2       | D-RC1        | D-TS1        | D-TS2        | D-PC1         |
|--------------------------------------------------------|-----------|--------------|--------------|--------------|---------------|
| IEFPCM                                                 | 0.0 (0.0) | 7.2 (-31.9)  | 34.2 (-7.3)  | 29.5 (-10.4) | -45.6 (-84.4) |
| Explicit<br>Solvent                                    | 0.0 (0.0) | 13.9 (-35.9) | 39.3 (-12.7) | 39.1 (-14.0) | -35.6 (-85.2) |

From the statistics in Tables S3 and S4 for the selected reaction pathways, direct solvent molecules involved in the reaction would lower the relative enthalpies but the entropy would increase significantly. The energy barriers from RC to TS are similar between IEFPCM solvation and explicit solvent involving system. This indicates the PCM solvation is more appropriate than the direct involvement of solvent molecules for the reaction in this paper.

## 8. PES scan of alpha-unsubstituted allenamide **1** with frozen dihedral angle coordinates

A relaxed PES scan of an alpha-unsubstituted molecule **1** along the dihedral angle  $D$  (C1, N, C2, C3) was done in which  $D$  (O1, C1, O2, C5) and  $D$  (O1, C1, N, C6) were frozen. As showed in Figure S1, energy profile is smooth since the structure of the oxazolidinone ring was nearly fixed. In contrast, the scan profile showed in Figure 1 in the article indicates some delay effect of some coordinates when changing  $D$  (C1, N, C2, C3).



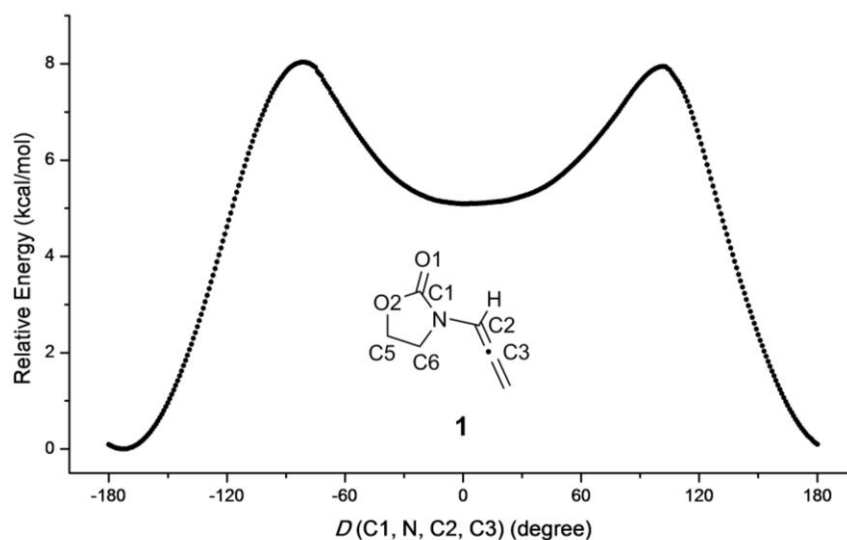

**Figure S1.** Scan profile of alpha-substituted allenamide **4**.

#### 9. PES scan of alpha-substituted allenamide **4**

To exploit the influence of alpha-substituent over the energy of allenamides, a relaxed PES scan of an alpha-substituted molecule **4** was done. As shown in Figure S1, the relative energy of the molecule with the dihedral angle  $D(C1, N, C2, C3)$  around  $0^\circ$  is about 2.0 kcal/mol while it is about 3.4 kcal/mol with  $D(C1, N, C2, C3)$  around  $180^\circ$ . In fact, the scan profile seems to fluctuate dramatically due to the effects from both the oxazolidinone ring and the alpha-phenyl group.

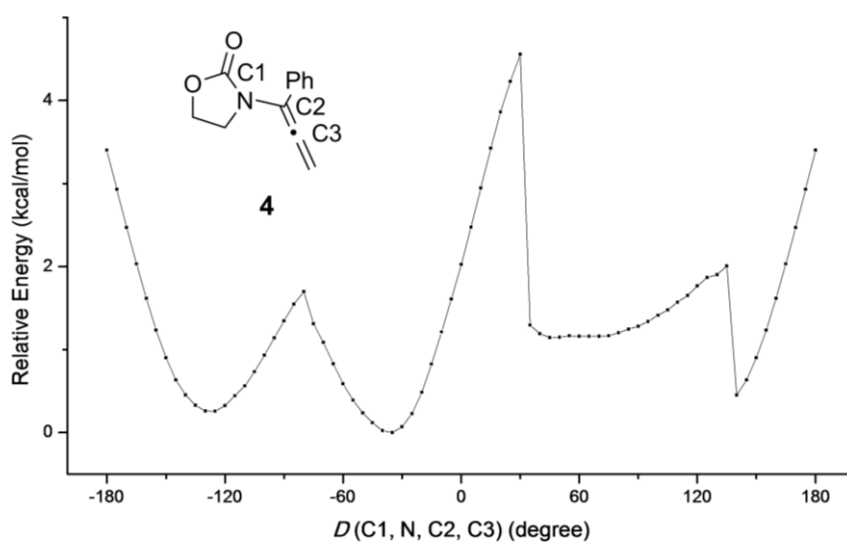

**Figure S2.** Scan profile of alpha-substituted allenamide **4**.

## 10. Cartesian coordinates and energies of computed structures of the model reaction with allenamine

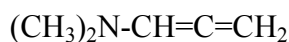

### M-TS-T1-mod

C,0,-2.0707992483,0.5252881255,3.3893568385  
H,0,-2.8673325971,0.077007014,3.9866905824  
H,0,-1.661505681,1.4636599084,3.7675324684  
C,0,-1.6327457511,-0.0338597816,2.2911932592  
C,0,-1.3976294766,-0.832370877,1.2456309708  
H,0,-0.602053415,-1.578033952,1.3198963235  
N,0,-2.0434118164,-0.8021360043,0.0380730193  
C,0,-3.0451533093,0.2172250433,-0.1735867554  
C,0,-1.309984914,-1.2005069392,-1.1458224609  
H,0,-3.6901029872,0.2966548769,0.7060955531  
H,0,-2.5925162184,1.2061471233,-0.3634803876  
H,0,-0.5619286272,1.9535532336,1.0455247329  
C,0,0.2442829358,1.2857867981,1.3476868139  
H,0,0.4520083601,1.343553478,2.4159473725  
Zn,0,1.5291001377,0.5139912509,0.1185821943  
Cl,0,1.9357781441,2.8004985417,0.7489653156  
C,0,2.5245854002,-0.7249753263,-0.9895833318  
H,0,2.275363839,-0.6752350482,-2.0525224334  
H,0,3.6068670171,-0.6227532546,-0.8869294281  
Cl,0,2.1281566122,-2.4299524363,-0.4547445832  
H,0,-3.6596125878,-0.0521567572,-1.0385626182  
H,0,-0.5640066874,-1.9613782198,-0.8936215443  
H,0,-1.9989417415,-1.6138553293,-1.8909975844  
H,0,-0.7837833279,-0.3454208178,-1.6091015571

-----  
Sum of electronic and thermal Free Energies=  
-1476.324748 (Hartree/Particle)  
One imaginary frequency -315.38.

### M-TS-T2-mod

C,0,-0.2301124831,3.7781236748,-1.1387438936  
H,0,0.7537601813,3.9563371214,-1.5757472751  
H,0,-1.0034433213,4.5018644047,-1.4036592182  
C,0,-0.4719380093,2.7649693535,-0.3429592598  
C,0,-1.1412611343,1.9761117773,0.5126672775  
H,0,-1.1076184384,2.2267392923,1.5764914965  
N,0,-1.7318797431,0.7845313516,0.2354604107  
C,0,-1.9766422813,0.4150040593,-1.1437356987  
C,0,-2.5483738652,0.1315373231,1.2394667485  
H,0,-2.8853864448,0.8916716014,-1.5409146903  
H,0,-1.1277812443,0.7289582858,-1.7618739756  
H,0,1.7530123549,1.9468024826,-1.0202673495  
C,0,1.5219791978,1.4879978567,-0.0596957176  
H,0,1.7692443856,2.1405306066,0.77618606  
Zn,0,1.2858700128,-0.4239491942,0.120480945  
Cl,0,3.5901663755,0.3836282559,0.0266320122  
C,0,0.9700658248,-2.3354778115,0.1812228808  
H,0,1.4893054033,-2.829006158,-0.6444914482  
H,0,1.3308493828,-2.78252321,1.1111356248  
Cl,0,-0.7796589657,-2.8324513553,0.031161303  
H,0,-2.0803021225,-0.6733277085,-1.2084909644

H,0,-2.2051053056,0.4187680339,2.2377479498  
H,0,-3.6103566171,0.403074592,1.1421548256  
H,0,-2.4471728326,-0.9543632754,1.1391776465

-----  
Sum of electronic and thermal Free Energies=  
-1476.325725 (Hartree/Particle)  
One imaginary frequency -376.09.

### M-TS-T3-mod

C,0,0.1685098799,0.4172050829,2.9089879375  
H,0,1.2399019329,0.2196688912,2.8356197621  
H,0,-0.1386413598,1.1088170056,3.6946142784  
C,0,-0.6974913361,-0.1393105506,2.1005397683  
C,0,-1.8373894854,-0.5148907716,1.5097336622  
H,0,-2.3223355315,-1.435785696,1.8419807532  
N,0,-2.4562761036,0.1093441871,0.4598585132  
C,0,-1.8229821156,1.2745675521,-0.1170189814  
C,0,-3.2326928544,-0.6964718611,-0.4588186156  
H,0,-1.4269803323,1.9164134328,0.6740867156  
H,0,-0.988237972,1.0024413538,-0.7871610835  
H,0,0.7224737073,-2.1305538984,1.4407937546  
C,0,0.5237755095,-1.5188705423,0.5610179743  
H,0,-0.3136295217,-1.9074636034,-0.0197818951  
Zn,0,1.7607428255,-0.224395801,-0.1668057507  
Cl,0,2.1199499336,-2.5696232337,-0.7643945958  
C,0,2.729032228,1.3661878428,-0.6892999496  
H,0,3.754584969,1.3843782606,-0.3136459319  
H,0,2.7620637328,1.5145113113,-1.7711075013  
Cl,0,1.9018179311,2.8360534534,0.0073084888  
H,0,-2.5591561845,1.839083957,-0.6983716928  
H,0,-2.6120668333,-1.1311212663,-1.2608013148  
H,0,-3.7223998133,-1.513122006,0.0807894251  
H,0,-4.009283366,-0.0806680601,-0.9256316308

-----  
Sum of electronic and thermal Free Energies=  
-1476.323869 (Hartree/Particle)  
One imaginary frequency -372.90.

### M-TS-O1-mod

C,0,0.1370150494,-1.213627808,-0.0411401036  
H,0,-0.3204316704,-1.6849285108,0.8320668857  
H,0,-0.305534575,-1.4925678112,-0.9996360271  
C,0,1.2238616304,-0.46991596,0.0433835477  
C,0,2.2756533092,0.3089098325,0.2039635248  
H,0,2.1181903255,1.386167745,0.3014811047  
N,0,3.5978138898,-0.0904747984,0.3028257738  
C,0,3.8664997876,-1.4875501801,0.0509889789  
C,0,4.5897175831,0.8274106841,-0.2183111128  
H,0,3.1973189306,-2.1058067542,0.658833302  
H,0,3.7171170932,-1.7600991196,-1.0085167775  
H,0,-0.4500164281,1.1408322167,1.1058606421

C,0,-0.932103956,0.8804889282,0.1623930277  
H,0,-0.4268453933,1.3253668765,-0.6960663077  
Zn,0,-2.8108683796,0.3407201057,0.0837174994  
Cl,0,-2.5203314132,2.6785988593,0.3253520384  
C,0,-4.3124529442,-0.8724603208,-0.0576130314  
H,0,-4.959607821,-0.8822467515,0.8219860164  
H,0,-4.934505879,-0.7088718799,-0.940141649  
Cl,0,-3.6360059021,-2.563964926,-0.2143043175  
H,0,4.9005956875,-1.7150907397,0.3286874488  
H,0,5.5710571382,0.5817625674,0.2022733429  
H,0,4.6672711325,0.7952274233,-1.3184053949  
H,0,4.340807385,1.8516014216,0.0788943982

-----  
Sum of electronic and thermal Free Energies=  
-1476.316999 (Hartree/Particle)  
One imaginary frequency -310.54.

### **M-TS-O2-mod**

C,0,-1.0650505886,-1.4618863311,-0.1297873891  
H,0,-0.4899671281,-1.5875201428,-1.0498481436  
H,0,-0.5784900639,-1.8346189419,0.7738552184  
C,0,-2.1649591469,-0.7295767042,-0.0785076788  
C,0,-3.14505396,0.1505622181,-0.0314512122  
H,0,-2.833934474,1.1851584163,0.1393805874  
N,0,-4.508668858,0.001324136,-0.20377619  
C,0,-5.0362016143,-1.3392215682,-0.2862632966  
C,0,-5.3518704899,0.9465773394,0.5001804976  
H,0,-4.5108609722,-1.9040525464,-1.0627324015  
H,0,-4.9454418443,-1.8906950577,0.6665930147  
H,0,-2.9317376677,-3.2841496618,0.3558608751  
C,0,-2.2500643323,-3.4072456619,-0.4864968109  
H,0,-2.6934454979,-3.0638498944,-1.4223118127  
Zn,0,-0.82695158,-4.7568047673,-0.474751963  
Cl,0,-2.9587428266,-5.6907785723,-0.8672197343  
C,0,0.9905859724,-5.411425887,-0.3406948649  
H,0,1.1679598299,-6.050360047,0.5270546825  
H,0,1.3383203551,-5.9377937016,-1.2320419609  
Cl,0,2.0842432377,-3.9603327637,-0.1417389549  
H,0,-6.0955971812,-1.2951548818,-0.5574253129  
H,0,-6.3406327637,0.97449304,0.02949332  
H,0,-5.4834630598,0.6929204941,1.5654970468  
H,0,-4.9194786156,1.9504750573,0.4370197038

-----  
Sum of electronic and thermal Free Energies=  
-1476.313963 (Hartree/Particle)  
One imaginary frequency -315.34.
